1 **Characterization of changes in the hemagglutinin that accompanied the emergence of H3N2/1968**  
2 **pandemic influenza viruses**

3  
4 Johanna West<sup>a</sup>, Juliane Röder<sup>a,1</sup>, Tatyana Matrosovich<sup>a</sup>, Jana Beicht<sup>a,2</sup>, Jan Baumann<sup>a,3</sup>, Nancy  
5 Mounogou Kouassi<sup>a,4</sup>, Jennifer Doedt<sup>a,5</sup>, Nicolai Bovin<sup>b</sup>, Gianpiero Zamperin<sup>c</sup>, Michele Gastaldelli<sup>c</sup>,  
6 Annalisa Salviato<sup>c</sup>, Francesco Bonfante<sup>c</sup>, Sergei Kosakovsky Pond<sup>d</sup>, Sander Herfst<sup>e</sup>, Ron Fouchier<sup>e</sup>,  
7 Jochen Wilhelm<sup>f</sup>, Hans-Dieter Klenk<sup>a</sup>, Mikhail Matrosovich<sup>a\*</sup>

8  
9 <sup>a</sup> Institute of Virology, Philipps University, Hans-Meerwein-Str. 2, 35043 Marburg, Germany

10 <sup>b</sup> Shemyakin-Ovchinnikov Institute of Bioorganic Chemistry of the Russian Academy of Sciences,  
11 Miklukho-Maklaya Str. 16/10, 117997 Moscow, GSP-7, Russia

12 <sup>c</sup> Division of Comparative Biomedical Sciences, Istituto Zooprofilattico Sperimentale delle Venezie,  
13 Viale dell'Università 10, 35020 Legnaro, Padova, Italy

14 <sup>d</sup> Institute for Genomics and Evolutionary Medicine, Temple University, SERC Room 644, 1925 N.  
15 12th St. Philadelphia, PA 19122, USA

16 <sup>e</sup> Department of Viroscience, Erasmus Medical Centre, Doctor Molewaterplein 40, 3015 GD Rotterdam,  
17 Netherlands

18 <sup>f</sup> Department of Internal Medicine II, and Cardio-Pulmonary Institute (CPI), Universities of Giessen and  
19 Marburg Lung Center (UGMLC), Member of the German Center for Lung Research (DZL) and The  
20 Institute of Lung Health (ILH), Gaffkyst. 11, 35392 Giessen, Germany

21

22 Short title: Changes in HA during emergence of the 1968 pandemic influenza virus

23

24 Keywords: influenza; host range; pandemics; interspecies transmission; selection; adaptation; receptor  
25 specificity; conformational stability; airway cultures; ferrets

26

27 <sup>1</sup> Current address: BioNTech SE, An der Goldgrube 12, 55131 Mainz, Germany

28 <sup>2</sup> Current address: Research Center for Emerging Infections and Zoonoses, University of Veterinary  
29 Medicine Hannover, Buenteweg 17, 30559 Hannover, Germany

30 <sup>3</sup> Current address: WHO Regional Office for Europe, UN City, Marmorvej 51, DK-2100 Copenhagen  
31 Ø, Denmark

32 <sup>4</sup> Current address: Department for Viral Zoonoses-One Health, Heinrich Pette Institute, Leibniz Institute  
33 for Experimental Virology, Hamburg, Germany

34 <sup>5</sup> Current address: Myriad International GmbH, Nattermannallee 1 / S19, 50829 Köln, Germany

35

36 \* Corresponding author. E-mail address [m.matrosovich@gmail.com](mailto:m.matrosovich@gmail.com)

37

38 **Abstract**

39           The hemagglutinin (HA) of A/H3N2 pandemic influenza viruses (IAVs) of 1968 differed from  
40 its inferred avian precursor by eight amino acid substitutions. To determine their phenotypic effects, we  
41 studied recombinant variants of A/Hong Kong/1/1968 virus containing either human-type or avian-type  
42 amino acids in the corresponding positions of HA. The precursor HA displayed receptor binding profile  
43 and high conformational stability typical for duck IAVs. Substitutions Q226L and G228S, in addition to  
44 their known effects on receptor specificity and replication, marginally decreased HA stability.  
45 Substitutions R62I, D63N, D81N and N193S reduced HA binding avidity. Substitutions R62I, D63N,  
46 D81N and A144G promoted virus replication in human airway epithelial cultures. Analysis of HA  
47 sequences revealed that substitutions D63N and D81N accompanied by the addition of N-glycans  
48 represent common markers of avian H3 HA adaptation to mammals. Our results advance understanding  
49 of genotypic and phenotypic changes in IAV HA required for avian-to-human adaptation and pandemic  
50 emergence.

51

52 **Introduction**

53           Wild aquatic birds represent the major natural reservoir of IAVs, which occasionally transmit,  
54 adapt and circulate for prolonged periods of time in domestic birds and mammals (Olsen et al., 2006;  
55 Yoon et al., 2014). Because animal IAVs do not replicate efficiently in humans, zoonotic transmissions  
56 of IAVs are typically restricted to isolated cases of infection [for a recent review, see (Wang et al.,  
57 2020)]. If a zoonotic IAV against which people have no protective immunity acquires the ability to  
58 transmit efficiently in humans, it may initiate an influenza pandemic. Genetic and virological data  
59 available for the four last pandemic IAVs (H1N1/1918, H2N2/1957, H3N2/1968, and H1N1/2009)  
60 indicate that they all contained antigenically novel hemagglutinin (HA) gene segments derived from

61 animal IAVs; the other gene segments originated from either animal or contemporary human IAVs [for  
62 reviews, see (Guan et al., 2010; Taubenberger and Kash, 2010)]. Thus, it is particularly important to  
63 understand which adaptive changes in the HA were required for the emergence of previous pandemic  
64 viruses from their animal precursors.

65         The HA mediates attachment of IAVs to sialic acid-containing glycan receptors on cells.  
66 Tropism, replication efficiency and pathogenicity of IAVs in different host species strongly depends on  
67 the optimal interplay between viral receptor-binding properties and spectra of sialoglycans expressed in  
68 target tissues of these species (reviewed by (Byrd-Leotis et al., 2017; de Graaf and Fouchier, 2014;  
69 Matrosovich et al., 2006b)). HAs of the previous pandemic IAVs differed from avian HAs by one or  
70 two amino acid substitutions in the conserved positions of the receptor-binding site (RBS). These  
71 substitutions were found to be essential for the switch of the HA receptor specificity from preferential  
72 binding to Neu5Ac $\alpha$ 2-3Gal-terminated glycans (avian-type receptors) to preferential binding to  
73 Neu5Ac $\alpha$ 2-6Gal-terminated glycans (human-type receptors). In the case of H2N2/1957 and H3N2/1968  
74 IAVs, substitutions Q226L and G228S were responsible for this switch in receptor specificity. In the  
75 case of H1N1/1918 and H1N1/2009 IAVs, this role was played by substitutions E190D and G225D/E  
76 [for recent reviews see (Gamblin et al., 2020; Thompson and Paulson, 2020)]. It remains unexplored  
77 whether other substitutions in the HA of pandemic IAVs were required for adaptation to receptors in  
78 humans, for example, by adjusting HA interactions with sub-terminal oligosaccharide parts of the  
79 receptors and/or modulating binding avidity.

80         After endocytosis and acidification of endosomes, the HA of IAVs undergoes a low-pH-  
81 triggered conformational transition that mediates fusion between the viral and endosomal membranes.  
82 The conformational stability of the HA determines both the pH range of viral-endosomal fusion and  
83 stability of the virus in the environment. There is growing evidence that the pH optimum of fusion and

84 stability of the HA differ between IAVs from different host species and that these differences may affect  
85 viral host range, pathogenicity, airborne transmission and pandemic potential [reviewed by (Russell et  
86 al., 2018)]. Human IAVs typically have a lower fusion pH optimum (from 5.0 to 5.4) than swine IAVs  
87 and zoonotic poultry IAVs of the H5 and H7 subtypes (pH from 5.6 to 6.2). The HAs of the  
88 H1N1/1918, H2N2/1957 and H3N2/1968 pandemic IAVs had a pH optimum of fusion typical for  
89 human viruses (5.1-5.4) (Baumann et al., 2016; Galloway et al., 2013). The earliest isolates of the  
90 H1N1/2009 had a less stable HA (pH optimum of fusion 5.4-5.5), but more stable variants were selected  
91 during a few months of virus circulation in humans (Cotter et al., 2014; Russier et al., 2016). The fusion  
92 pH and stability of the immediate HA precursors of the pandemic viruses were not studied, and it  
93 remains obscure whether alterations of these properties played a role in pandemic emergence.

94 We previously studied adaptive changes in the HA of the pandemic IAV A/Hong Kong/1/1968  
95 (H3N2), which differed from the inferred avian ancestor HA by eight amino acid substitutions.  
96 Introduction of avian-virus-like amino acids at positions 226 and 228 of the HA altered cell tropism,  
97 reduced replication efficiency in cultures of human airway epithelial cells and abolished transmission of  
98 the virus in experimentally infected pigs (Matrosovich et al., 2007; Van Poucke et al., 2013). A  
99 combination of avian-type amino acid reversions at five other HA positions impeded replication in  
100 human airway cultures and markedly impaired transmissibility in pigs (Van Poucke et al., 2015). These  
101 results confirmed the critical role of substitutions Q226L and G228S in the avian-to-human  
102 transmission of the H3 HA and suggested that at least some of the other substitutions contributed to the  
103 emergence of the H3N2 pandemic virus.

104 In this study, we wished to further characterize changes in the HA that accompanied its avian-to-  
105 human adaptation during generation of the 1968 pandemic IAVs. We also wished to identify which  
106 substitutions, in addition to substitutions Q226L and G228S, played a role in the adaptation to humans.

107 To address these questions, we prepared a panel of 18 recombinant variants of A/Hong Kong/1/1968  
108 (H3N2) containing either human-type or avian-type amino acids at HA positions that separated the  
109 H3N2/1968 viruses from their inferred avian ancestor. We compared these IAVs for their membrane  
110 fusion activity and stability, receptor-binding properties, replication efficiency in MDCK cells and  
111 cultures of human airway epithelial cells. We also analyzed patterns of evolution of H3 HA codons in  
112 question in IAVs from different host species.

113

## 114 **2. Materials and Methods**

### 115 *2.1. Cells and wild type IAVs*

116 Cultivation of all non-infected and virus-infected cell cultures was performed at 37°C in 5% CO<sub>2</sub>.  
117 MDCK cells, human embryonic kidney 293T cells, and human bronchial adenocarcinoma Calu-3 cells  
118 were propagated using Dulbecco's modified Eagle medium (DMEM; Gibco) supplemented with 10%  
119 fetal calf serum (FCS; Gibco), 100 IU/ml penicillin and 100 µg/ml streptomycin (pen-strep), and 2 mM  
120 glutamine. DMEM containing pen-strep, 2 mM glutamine and 0.1% bovine serum albumin (PAA  
121 Laboratories) (DMEM-BSA) was used for the viral infections.

122 Differentiated cultures of primary human tracheobronchial cells (HTBE) were prepared as  
123 described previously (Matrosovich et al., 2004). In brief, primary HTBE cells (Lonza) were expanded  
124 on plastic in BEGM growth medium (Lonza) and stored in aliquots in liquid nitrogen. Thawed passage-  
125 1 cells were grown on membrane supports (12-mm Transwell-Clear; pore size, 0.4 µm; Corning) in a  
126 1:1 mixture of BEGM with DMEM. After 1 week, the medium was removed from the upper  
127 compartment and cells were maintained in BEGM/DMEM mixture under air-liquid interface (ALI)  
128 conditions. Fully differentiated 5- to 8-week-old cultures were used for the experiments.

129 A/Hong Kong/1/1968 (H3N2) was provided by Earl Brown, University of Ottawa, Ottawa,  
130 Ontario, Canada and grown in MDCK cells. A/Mallard/Alberta/279/1998 (H3N8) and A/Ruddy  
131 turnstone/Delaware/2378/1988 (H7N7) were provided by Robert Webster, St. Jude Children's Research  
132 Hospital, Memphis, TN, USA. The avian viruses were grown in 11-days-old embryonated hen's eggs.

133

### 134 *2.2. Plasmids and recombinant IAVs*

135 Reverse genetics plasmid pHW2000 and pHW2000 plasmids containing gene segments of  
136 A/Puerto Rico/8/1934 (H1N1) (PR8) were provided by Richard Webby and Robert Webster, St. Jude  
137 Children's Research Hospital, Memphis, TN, USA. The eight pHW2000 plasmids containing  
138 gene segments of HK/68, modified HA plasmids R2 and R5 and corresponding recombinant viruses  
139 were prepared previously (Matrosovich et al., 2007; Van Poucke et al., 2013).

140 Mutations were introduced into the HA plasmid of A/Hong Kong/1/1968 using a site-directed  
141 mutagenesis kit (QuikChange; Stratagene). 2:6 recombinant IAVs containing wt and modified HA of  
142 A/Hong Kong/1/1968, NA of A/Hong Kong/1/1968 and the remaining six gene segments of PR8 were  
143 generated by reverse genetics (Hoffmann et al., 2000) as described before (Gerlach et al., 2017). These  
144 viruses and their designations are listed in the Fig. 1a. They were amplified in MDCK cells using  
145 DMEM-BSA medium containing 1 µg/ml of TPCK-treated trypsin (Sigma), clarified by low-speed  
146 centrifugation, and stored in aliquots at -80°C. The identities of the HA- and NA-encoding genes of all  
147 viruses were confirmed by sequencing.

148

### 149 *2.3. Virus titration and plaque size*

150 Viruses were titrated in MDCK cells using single-cycle focus formation assay in 96-well plates  
151 (Matrosovich et al., 2007) and plaque formation assay under Avicel RC/CL overlay medium in 6-well

152 plates (Matrosovich et al., 2006a). Infected cells were detected by immunostaining for viral  
153 nucleoprotein (NP). The viral concentrations were expressed in focus forming units (FFU) and plaque  
154 forming units (PFU) per ml, respectively. To determine the size of the plaques, plate wells containing  
155 from 5 to 50 plaques were scanned with a flat-bed scanner. The plaque diameters were measured with  
156 the Ruler Tool of Adobe Photoshop CS3 software version 10.0.1.

157

#### 158 *2.4. Low-pH-induced conformational transition of HA*

159 Alteration of the HA sensitivity to protease digestion that accompany acid-induced conformational  
160 transition was determined using a solid-phase receptor binding assay as described previously  
161 (Matrosovich and Gambaryan, 2012; Van Poucke et al., 2015). In brief, viruses were adsorbed in the  
162 wells of fetuin-coated microtiter plates and incubated with buffers containing 25 mM MES, 150 mM  
163 NaCl, 0.9 mM CaCl<sub>2</sub> and 0.5 mM MgCl<sub>2</sub> (MES-NaCl). The pH of the buffers varied from 4.8 to 6.0 in  
164 0.1 steps. After incubation with MES-NaCl buffers for 15 min at 37°C, the plates were washed with 25  
165 mM phosphate buffered saline pH 7.2 (PBS) and incubated with 0.1 mg/ml of proteinase K in PBS for 1  
166 h at 37°C. After washing with PBS containing 0.01% tween 80, binding of peroxidase-labelled fetuin  
167 (fet-HRP) was determined and expressed in percentages of binding to low-pH-exposed virus with  
168 respect to that of the virus exposed to pH 7. Binding-versus-pH curves were plotted, and pH values that  
169 corresponded to HA inactivation by 50% (pH<sub>50</sub>) were determined by linear interpolation.

170

#### 171 *2.5. Inactivation of HA by chaotropic agent and heat treatment*

172 The effects of guanidinium hydrochloride (GnHCl) and elevated temperature on HA inactivation  
173 were quantified using the solid phase receptor binding assay described above. Viruses adsorbed in the  
174 wells of fetuin-coated microtiter plates were either incubated for 1 h at 4°C with PBS containing variable

175 concentrations of GnHCl or incubated with PBS for different time periods at 65°C. After washing, the  
176 binding of fet-HRP to GnHCl-treated and heat-treated viruses were determined and expressed in  
177 percentages with respect to the binding to control viruses incubated at 4°C with PBS. Concentration of  
178 GnHCl and incubation time at 65°C that reduced fet-HRP binding by 50% (IC<sub>50</sub> and t<sub>50</sub>, respectively)  
179 were determined by linear interpolation.

180

#### 181 *2.6. Reduction of viral infectivity after 2-h incubation at 45 °C*

182 Viral stocks were diluted in DMEM-BSA to a concentration of 4000 FFU per ml. Replicate 0.7-  
183 ml aliquots were incubated in closed Eppendorf tubes for 2 h either in a water bath at 45°C or on ice  
184 (control). All samples were next titrated using single-cycle focus formation assay in MDCK cells. Five  
185 technical replicates were used for the titration of each sample, and the results were averaged. The titers  
186 of heat-treated viruses were expressed as percentages of the corresponding control titers.

187

#### 188 *2.7. Low pH-induced polykaryon formation in virus-infected cells*

189 pH-dependence of virus-induced cell-cell fusion was assayed as described (Reed et al., 2009)  
190 using MDCK cells instead of VERO cells. In brief, MDCK cultures in 96-well plates were inoculated  
191 with 1 FFU of the virus per cell in DMEM-BSA and incubated overnight. The medium was discarded,  
192 and the cultures were incubated for 15 min at 37°C with the DMEM-BSA containing 1 µg/ml of TPCK  
193 trypsin. The trypsin-containing medium was substituted by pre-warmed MES-NaCl pH-buffers (pH  
194 range from 5.3 to 7.0), incubated for 10 min at 37°C and washed once with PBS containing 0.9 mM  
195 CaCl<sub>2</sub> and 0.5 mM MgCl<sub>2</sub> (PBS+). After 3-h incubation with DMEM-BSA at 37°C, the cells were fixed  
196 with 70% ethanol, stained with Giemsa stain (Sigma) and analysed under the microscope. The highest



197 pH at which more than 10 syncytia with more than 5 nuclei/syncytium were observed was taken as the  
198 pH threshold of polykaryon formation.

199

#### 200 *2.8. Infection inhibition by ammonium chloride*

201 The assay determined virus dependence on endosomal acidification during infection as  
202 described previously (Baumann et al., 2016). In brief, MDCK cells in 96-well plates were inoculated  
203 with 200 FFU of the virus in 0.1 ml DMEM-BSA containing various concentrations of NH<sub>4</sub>Cl. The cells  
204 were incubated overnight, fixed and immuno-stained for viral NP. Concentrations of NH<sub>4</sub>Cl that  
205 reduced numbers of infected cells by 50% (IC<sub>50</sub>) were determined from dose-response curves by linear  
206 interpolation.

207

#### 208 *2.9. Infection inhibition by Vibrio cholerae sialidase*

209 Binding avidity of the viruses for receptors on MDCK cells was compared using gradual  
210 desialylation of receptors with bacterial sialidase as described previously (Van Poucke et al., 2015). In  
211 brief, MDCK cells in 96-well plates were incubated with 0.05 ml per well of serial dilutions of sialidase  
212 in DMEM-BSA for 30 min at 37°C. Two hundred FFU of the viruses in 0.05 ml of DMEM-BSA were  
213 added per well without removing sialidase. No trypsin was added to the medium to avoid multicycle  
214 replication. The cultures were incubated overnight, fixed and immuno-stained for viral NP.  
215 Concentrations of sialidase that reduced numbers of infected cells by 50% (IC<sub>50</sub>) were determined from  
216 dose-response curves by linear interpolation.

217

#### 218 *2.10. Viral binding to sialoglycopolymers*

219 Receptor-binding specificity of the viruses was characterized using soluble synthetic  
220 sialoglycopolymers (SGPs) (GlycoNZ, Auckland, New Zealand) (Tuzikov et al., 2021). The SGPs  
221 contained 20 mol% of sialyloligosaccharide moieties and 5 mol% of biotin attached to either the low-  
222 molecular-mass (20-kDa) or high-molecular-mass (1000-kDa) poly-N-(2-hydroxyethyl)acrylamide  
223 backbone.

224 The structures of the sialyloligosaccharide moieties and designations of SGPs are shown below.

|     |                                                                          |                       |
|-----|--------------------------------------------------------------------------|-----------------------|
| 225 | Neu5Ac $\alpha$ 2-3Gal $\beta$ 1-4GlcNAc $\beta$                         | 3'SLN                 |
| 226 | Neu5Ac $\alpha$ 2-3Gal $\beta$ 1-4(6-Su)GlcNAc $\beta$                   | 6-Su-3'SLN            |
| 227 | Neu5Ac $\alpha$ 2-3Gal $\beta$ 1-4(Fuc $\alpha$ 1-3)GlcNAc $\beta$       | SLe <sup>x</sup>      |
| 228 | Neu5Ac $\alpha$ 2-3Gal $\beta$ 1-4(Fuc $\alpha$ 1-3)(6-Su)GlcNAc $\beta$ | 6-Su-SLe <sup>x</sup> |
| 229 | Neu5Ac $\alpha$ 2-3Gal $\beta$ 1-3GlcNAc $\beta$                         | SLe <sup>c</sup>      |
| 230 | Neu5Ac $\alpha$ 2-3Gal $\beta$ 1-3GalNAc $\alpha$                        | 3'STF                 |
| 231 | Neu5Ac $\alpha$ 2-6Gal $\beta$ 1-4GlcNAc $\beta$                         | 6'SLN                 |

232 The binding of the viruses to SGPs was determined in a direct solid-phase binding assay as  
233 described previously (Matrosovich and Gambaryan, 2012). In brief, viruses adsorbed in the wells of  
234 fetuin-coated 96-well plates were allowed to interact with serially diluted SGPs followed by incubation  
235 with peroxidase-labelled streptavidin and tetramethylbenzidine (TMB) substrate solution. The  
236 association constants of virus complexes with SGPs ( $K_{ass}$ ) were determined from the slopes of  $A_{450}/C$   
237 versus  $A_{450}$  plots, where C is the concentration of the sialic acid in solution and  $A_{450}$  is the absorbance in  
238 the corresponding well.

239

240 2.11. *Virus attachment and single-cycle infection in differentiated HTBE cultures*

241 One day before the experiments, apical sides of the cultures were incubated with 0.15 ml of  
242 DMEM for 1 h at 37°C to collect secreted mucus. The mucus suspension was clarified by centrifugation  
243 at 6000xg for 5 min and stored at 4°C. Immediately before the experiments, the cultures were washed  
244 10 times with PBS+.

245 To study virus attachment, the cultures were incubated with virus suspensions in DMEM-BSA for  
246 1 h at 4°C. Control cultures were incubated with DMEM-BSA. The cultures were washed with PBS+  
247 and fixed with 4% paraformaldehyde for 30 min at 4°C. Attached viruses were quantified by  
248 immunostaining of the apical sides of the cultures directly on Transwell-Clear supports. The cultures  
249 were blocked with 5% normal donkey serum (NDS, Dianova) at 4°C overnight, followed by sequential  
250 1-h incubation at room temperature with in-house made rabbit polyclonal antibodies against HK and  
251 peroxidase-labelled donkey anti-rabbit antibodies (Dianova). Both antibodies were diluted in PBS  
252 buffer containing 10% normal horse serum (Dianova), 1% BSA, 1% NDS, 2% of the HTBE mucus  
253 suspension and 0.05% tween 80. After washing with 0.05% tween 80 in PBS, peroxidase activity was  
254 determined using TMB substrate. The mean substrate absorbency at 450 nm in the control cultures was  
255 subtracted from the absorbencies in virus-treated cultures.

256 To quantify concentration of physical virus particles in suspensions used in HTBE attachment  
257 experiments, non-specific virus binding to plastic was measured (Gambaryan et al., 1998a). Viral stocks  
258 were serially diluted in PBS and incubated in the wells of the immunoassay 96-well microplate  
259 (Greiner) overnight at 4°C (0.05 l/well). The wells were washed, fixed and immuno-stained with anti-  
260 HK antibodies and TMB substrate as described above for the HTBE experiments.

261 To study ability of the virus to enter into cell and initiate the first round of infection, replicate  
262 HTBE cultures were inoculated with  $2 \times 10^4$  FFU of the viruses in 0.2 ml of either DMEM-BSA or  
263 DMEM-BSA mixture with the mucus suspension collected the day before (3:1, vol/vol). The inoculum

264 was removed 1 h post inoculation. The cultures were incubated for an additional 7 h at 37°C under ALI  
265 conditions, fixed, immuno-stained for viral NP, and infected cells were counted under an inverted  
266 microscope as described elsewhere (Gerlach et al., 2017).

267

## 268 *2.12. Competitive replication in HTBE cultures*

269 Competition between two viruses was studied by inoculating 5-6 replicate HTBE cultures with a  
270 mixture containing  $4 \times 10^3$  FFU of each virus in 0.2 ml DMEM. After 1-h incubation at 37°C, the  
271 inoculum was removed, and the cultures were incubated under ALI conditions. At 24, 48, 72, and 96 h  
272 post-inoculation, 0.3 ml DMEM was added to the apical sides of the cultures for 30 min. The apical  
273 medium was collected, stored at  $-80^\circ\text{C}$ , and analysed together with the stored aliquot of the original  
274 inoculated virus mixture. Proportions of each HA genotype in the inoculated virus mixture and HTBE-  
275 harvests were determined by Sanger sequencing as described previously (Wendel et al., 2015).

276 Simultaneous competition between HK and 6 single-point HA mutants was studied as described  
277 above with the following modifications. HK and its 6 mutants were mixed in equivalent amounts based  
278 on infectious titers. Three different dilutions of this mixture were inoculated into HTBE cultures using 5  
279 PFU of each virus per culture (low dose, L, 12 replicate cultures), 20 PFU per culture (medium dose, M,  
280 12 cultures), and 320 PFU per culture (high dose, H, 6 cultures). The apical material was harvested  
281 once at 72 h post-inoculation and titrated for viral infectivity. From RNA extraction to variant calling,  
282 samples were processed as described previously (Wade et al., 2018), with the only exception of being  
283 sequenced for 300 bp paired-end. Proportions of each mutant HA genotype in the inoculated mixture  
284 and HTBE harvests were determined using the frequency of the single nucleotide polymorphism  
285 characterizing each mutant segment. In order to determine the effect of the inoculum titre on the  
286 proportion of each genotype in the harvest, we employed a generalized linear model relating proportions  
287 to inoculum titre (expressed by the variable “treatment” as L/M/H), specific genotype and the  
288 interaction of these two variables. Since proportions of the genotypes were clearly over dispersed, the  
289 model assumed a beta-binomial distribution in which the dispersion parameter  $\sigma$  was estimated as a  
290 function of “treatment” (Rigby and Stasinopoulos, 2005); for details of model construction see  
291 Supplementary Method). P values reflecting differences between the harvest and the inoculum were  
292 adjusted according to Dunnett’s method (Lenth et al., 2019).

293  
294  
295  
296  
297  
298  
299  
300  
301  
302  
303  
304  
305  
306  
307  
308  
309  
310  
311  
312  
313  
314  
315  
316  
317  
318  
319

### *2.13. Airborne transmission between ferrets*

Respiratory droplet transmission experiments were performed as described previously (Munster et al., 2009). In brief, groups of two seronegative female adult ferrets were inoculated intranasally with  $10^6$  TCID<sub>50</sub> of each virus by applying 0.25 ml of virus suspension to each nostril. One day after inoculation, one naive ferret was placed opposite to each inoculated ferret in a transmission cage that prevented direct contact but allowed airflow from the inoculated to the naïve ferret. Nose and throat swabs were collected from inoculated and contact ferrets on days 1, 3, 5, and 7 post-inoculation and days 1, 3, 5, 7 and 9 post-exposure, respectively. Virus titers in swabs were determined by end-point titration in MDCK cells. Blood was collected from all ferrets on day 14 post exposure, and the presence of antibodies against the tested viruses was analysed by hemagglutination inhibition assay using standard procedures (WHO, 2002). All animals were humanely killed at the end of the in-vivo phase of the study.

### *2.14. HA sequences and phylogenetic analyses*

Full-length nucleotide sequences of the H3 HAs were downloaded from the GISAID EpiFlu database (Shu and McCauley, 2017) accessed on March 11, 2020. Sequences were aligned using the MAFFT multiple alignment program implemented in the Unipro UGENE package (Okonechnikov et al., 2012), version 35. Sequences containing gaps and ambiguities, non-unique sequences and sequences of laboratory-derived IAVs were removed manually using Bio-Edit version 7.1.11 (Hall, 2004). Jalview version 2.11 (Waterhouse et al., 2009) was used to select representative sequences of swine IAVs with a redundancy threshold of 99%. The evolutionary history was inferred using IQ-TREE 2 with ModelFinder (Kalyaanamoorthy et al., 2017; Minh et al., 2020), the tree was plotted using MEGA7 (Kumar et al., 2016). Protein logos were generated using web-based application WebLogo (Crooks et al., 2004).

320           2.15. Selection pressure analyses

321           Three groups of host-specific HA sequences were analyzed, which included 1492 sequences of  
322 avian IAVs, 406 sequences of equine, canine, feline and seal IAVs and 803 sequences of human IAVs  
323 isolated in the years from 1968 to 1999. We partitioned the maximum likelihood tree into three groups  
324 of *internal* branches: human (801 branches), avian (1496 branches) and mammalian (394 branches)..  
325 Our analyses used dN/dS techniques [for a review, see (Pond et al., 2006)]. Because internal branches  
326 encompass at least one transmission event, we can assume that changes occurring along these branches  
327 have been “seen” by selection. Not including changes occurring along terminal branches we reduce the  
328 biasing effect of intra-host variation, which may be maladaptive on the population level (Pond et al.,  
329 2006), and tends to inflate dN/dS estimates (Kryazhimskiy and Plotkin, 2008). For each site in the HA  
330 alignment, we addressed the following four questions based on tests available in the HyPhy 2.5 package  
331 (Kosakovsky Pond et al., 2020).

332           1. What is the mean dN/dS at a site along the branches of interest? Does the site evolve subject  
333 to pervasive negative ( $dN/dS < 1$ ) or positive diversifying ( $dN/dS > 1$ ) selection? This test uses the  
334 Fixed Effects Likelihood (FEL) method (Kosakovsky Pond and Frost, 2005), and significance was  
335 established using a likelihood ratio test (LRT), at  $p \leq 0.05$ . In addition, we inferred the number of  
336 synonymous and non-synonymous changes and the most likely character at each internal node of the  
337 tree using the SLAC method.

338           2. Does the site evolve subject episodic positive diversifying selection ( $dN/dS > 1$  along some  
339 fraction of the tree)? This test used the Mixed Effects Model of Evolution (MEME) method (Murrell et  
340 al., 2012), and significance was established using LRT, at  $p \leq 0.05$ .

341           3. Does the site evolve under different selective pressures between groups of branches (dN/dS  
342 differ between some or all of the four sets of branches)? This test used the Contrast Fixed Effects

343 Likelihood (Contrast-FEL) method (Kosakovsky Pond et al., 2021), and significance was established  
344 using a collection of seven LRT (one for each pair of branch sets, and an omnibus test), with corrected p  
345  $\leq 0.01$ .

346 4. Is there evidence of directional evolution on “human” branches, where specific amino-acids  
347 are being selected for? This is based on an improved version of the Directional Evolution of Protein  
348 Sequences (DEPS) test (Kosakovsky Pond et al., 2008), and uses empirical Bayes Factors  $\geq 100$  to  
349 identify, which, if any residues at a given site are being selected for / against. This test is not based on  
350 dN/dS and is more suited to detect “sweeping” changes which involve only a few substitutions.

351

#### 352 *2.16. Statistics*

353 Statistical tests were performed and using Graphpad Prism 8.4 and R 3.6.0 ([www.r-project.org](http://www.r-project.org)).  
354 Unless stated otherwise, figures show data from individual biological replicates. The bars or horizontal  
355 lines indicate the group means, the length of the error bars is one standard deviation. The details are  
356 explained in the table footnotes and figure legends. Student’s t test was used to compare two groups.  
357 Dunnett’s or Tukey’s multiple comparison tests were performed to compare more than two groups.  
358 More sophisticated statistical models were fitted by generalized linear models in R. If not stated  
359 otherwise, strictly positive variables were log-transformed before analysis, and percentage data were  
360 analyzed using quasi-binomial models with logit link. If the data consisted of experiments made on  
361 different days, day was included as a random intercept. Multiple tests of coefficients or contrasts within  
362 these models were done using simultaneous tests for general linear hypotheses, and P values were  
363 adjusted using the single step method (Hothorn et al., 2008) (comparable to Dunnett’s and Tukey’s  
364 procedure for multiple-to-one and all-pairwise comparisons). If mixed models were used to account for  
365 day-to-day variations between experiments, figures show data adjusted for day (that is, the variance

366 attributed to day-to-day variation is removed from the data to better show how the values depend on the  
367 fixed factor). Details are explained in the methods sections of the respective experiments. Observed  
368 statistical significance is indicated in the figures as follows: \*,  $P < 0,05$ ; \*\*,  $P < 0,01$ ; \*\*\*,  $P < 0,001$ .

369  
370

### 371 **3. Results**

#### 372 *3.1. Preparation of recombinant variants of A/Hong Kong/1/1968-PR8 (H3N2) with substitutions in the* 373 *HA*

374 The 1968 pandemic IAV HA differed from the avian precursor by 8 amino acid substitutions  
375 (Bean et al., 1992; Van Poucke et al., 2015) (Fig. 1, supplementary Fig. S1). Seven substitutions were  
376 shared by all virus strains isolated in the first year of the pandemic. One of these substitutions, F(-2)L,  
377 was located in the cleavable signal peptide and six substitutions were located in the HA1 subunit of the  
378 mature HA protein, with G228S and Q226L in the RBS, A144G and N193S at the rim of the RBS and  
379 R62I and N92K in the vestigial esterase subdomain. The eighth substitution from D to N occurred at  
380 either position 63 or position 81 in the vestigial esterase subdomain of the HA and generated a new  
381 glycosylation site, N<sub>63</sub>-C<sub>64</sub>-T<sub>65</sub> or N<sub>81</sub>-E<sub>82</sub>-T<sub>83</sub>, respectively. Either site was glycosylated with attached  
382 N-glycans detectable by X-ray analysis (see, for example, structures 4O58.pdb and 2YPG.pdb).  
383 Pandemic IAVs with these two HA variants differing solely by the location of new N-linked glycan co-  
384 circulated during 1968 and a few years afterwards. The A/Memphis/1/1968-like IAVs containing an N-  
385 glycan at position 63 (NG<sub>63</sub>) became extinct after 3 years of circulation; the A/Hong Kong/1/1968-like  
386 IAVs (NG<sub>81</sub>) continued to cause seasonal influenza outbreaks until 1976 and were substituted by a drift  
387 lineage that lost NG<sub>81</sub> and gained NG<sub>63</sub> (for the evolution of HA glycosylation sites 63 and 81 in human  
388 H3N2 viruses, see supplementary Fig. S2).



389 To study phenotypic effects of the substitutions, we generated a panel of 2:6 recombinant IAVs  
390 that contained HA and NA of A/Hong Kong/1/1968 (H3N2) and the remaining 6 gene segments of the  
391 laboratory strain PR8. The panel included the virus with wild type HA (HK) and its HA variants with  
392 either human-type or avian-type amino acids at corresponding HA positions (Fig. 1a). The R7 variant  
393 carried all seven avian-type substitutions in the mature HA, and thus mimicked the HA structure of the  
394 avian precursor of the 1968 pandemic IAVs. Two viruses were made to represent combined effects of  
395 substitutions at either positions 226 and 228 (variant R2) or at five other positions (variant R5). Single-  
396 point mutants of HK served to determine effects of reversions from human-type to avian-type amino  
397 acid at individual HA positions. The double mutant HK-81-63 represented the sequence of  
398 A/Memphis/1/1968 and was used to study the effect of the NG<sub>63</sub>. The point mutants of R5 were made to  
399 study effects of individual reversions from avian-type to human-type amino acids in the context of the  
400 avian HA with human-type L<sub>226</sub> and S<sub>228</sub>. Finally, variants HK-2 and R5-2 were prepared to characterize  
401 the phenotype of the amino acid substitution in the signal peptide.

402

### 403 *3.2. Effects of substitutions on HA conformational stability and membrane fusion activity*

404 We first compared stability and fusion properties of HK, its avian precursor R7 and the  
405 intermediate variants R2 and R5 (Fig. 2). As these characteristics critically depend on the low-pH-  
406 triggered conformational transition of the HA, we determined the pH at which the viral HA changed its  
407 conformation by studying pH-induced alteration of HA sensitivity to protease digestion (Fig. 2a). R7  
408 and R2 underwent conformational transition at a slightly lower pH than did HK and R5. In agreement  
409 with this finding, R7 and R2 initiated syncytia formation in MDCK cells at about 0.1 units of pH lower  
410 than did HK and R5 (Fig. 2b). To corroborate observed differences in viral fusion pH, we compared  
411 inhibition of viral infection in MDCK cells by ammonium chloride which counteracts endosomal

412 acidification (Fig. 2c). R2 and R7 were more sensitive than HK and R5 to inhibition by  $\text{NH}_4\text{Cl}$ ,  
413 confirming that R2 and R7 require a lower pH in endosomes for fusion and cell entry.

414 Acid stability of the HA correlates, at least partially, with HA resistance to heat and denaturing  
415 agents. To test effects of the latter two factors of environmental stability we studied inactivation of the  
416 HA receptor-binding activity by the chaotropic agent guanidinium chloride (GnHCl) (Fig. 2e) and heat  
417 treatment (Fig. 2d) as well as the effect of heat treatment on viral infectivity (Fig. 2f). In general, the  
418 stability of the viruses in all three assays correlated with their acid stability. R7 was the most stable  
419 variant, HK was least stable, whereas R2 and R5 displayed intermediate stability.

420 We next studied the effects of non-226/228 single-point HA substitutions in HK and R5 using  
421 three assays (supplementary Fig. S3). None of the substitutions affected pH optimum of the HA  
422 conformational transition in the protease sensitivity assay. Four point mutants differed from the  
423 corresponding parental viruses by their sensitivity to ammonium chloride. Among them, mutants R5-63  
424 and R5-81 containing N-linked glycan  $\text{NG}_{63}$  and  $\text{NG}_{81}$ , respectively, were less sensitive than R5,  
425 whereas the mutant HK-81 lacking  $\text{NG}_{81}$  was more sensitive than HK. We concluded that N-glycan-  
426 containing variants entered the cells from less acidic endosomal compartment. This finding agrees with  
427 the study in which the presence of N-glycans in the globular head of H1N1 IAVs reduced receptor-  
428 binding avidity and facilitated HA-mediated fusion (Ohuchi et al., 2002). In the polykaryon formation  
429 assay, the avian-type amino acid in the signal peptide of the variants HK-2 and R5-2 correlated with a  
430 minor ( $\Delta\text{pH}$ , +0.1) but reproducible elevation of their pH threshold of fusion (supplementary Fig. S3b).  
431 This effect, albeit small, was unexpected given that the signal peptide is not present in the mature HA  
432 and that HK-2 and R5-2 did not differ from their parents, HK and R5, in the conformational transition  
433 assay and in any other assays used (see below). Alteration of the signal peptide could potentially affect  
434 intracellular maturation, secretion and incorporation of the HA into virus particles, and recent

435 bioinformatics analysis revealed that passaging of human IAVs in cell culture was occasionally  
436 accompanied by mutations in the signal peptide (Lee et al., 2019). These notions prompt further work  
437 on potential effects of the HA signal peptide on replication and interspecies adaptation of IAVs.

438 Collectively, this part of the study revealed that a combination of substitutions Q226L and  
439 G228S increased the pH of the conformational transition of the pandemic virus HA by about 0.15 pH  
440 units and as a consequence marginally decreased its environmental stability. The effects of other avian-  
441 to-human point substitutions and of their combination on conformational stability and membrane fusion  
442 activity were either smaller or below the detection limit of the assays.

443

### 444 *3.3. Receptor-binding profile of the avian precursor of the 1968 pandemic viruses and effect of amino* 445 *acid substitutions on the HA preference for the type of Neu5Ac-Gal linkage*

446 To characterize receptor-binding properties of the viruses we determined their binding to soluble  
447 synthetic SGPs carrying multiple copies of sialyloligosaccharide moieties attached to a hydrophilic  
448 polymeric carrier. The high molecular mass (1 MDa) SGPs contained about 50 times more copies of the  
449 sialoligand per macromolecule and bound to IAVs with much higher avidity than structurally identical  
450 20-kDa SGPs. As a result, utilization of the 1-MDa SGPs was instrumental for comparison of IAVs  
451 with large differences in binding avidity, such as avian and human IAVs, whereas the 20-kDa SGPs  
452 were more useful than 1-MDa SGPs for characterization of IAVs with minor differences in the binding  
453 avidity (Matrosovich and Gambaryan, 2012; Tuzikov et al., 2021).

454 Although most avian IAVs use Neu5Ac $\alpha$ 2-3Gal-terminated glycans as their cellular receptors,  
455 viruses adapted to species of the orders *Anseriformes*, *Charadriiformes* and *Galliformes* typically differ  
456 by their ability to recognize sub-terminal parts of the receptor glycans [(Gambaryan et al., 2018) and  
457 references therein]. We assumed that analysis of the fine receptor binding specificity of R7 may predict

458 which avian species perpetuated the precursor of the 1968 pandemic virus. To this end, we determined  
459 binding of R7 and R2 to a panel of Neu5Ac $\alpha$ 2-3Gal-containing 20-kDa SGPs. Two representative wild-  
460 type viruses, A/mallard/Alberta/279/1998 (H3N8) (mal-H3N8) and A/ruddy turnstone/  
461 Delaware/2378/1988 (H7N7) (rt-H7N7), were used for a comparison (Fig. 3a). R7 shared the binding  
462 profile with mal-H3N8 which represented typical receptor-binding properties of IAVs in ducks. Similar  
463 to other duck viruses (Gambaryan et al., 2018), R7 and mal-H3N8 bound poorly to fucosylated  
464 receptors SLe<sup>x</sup> and 6-Su-SLe<sup>x</sup> and bound more efficiently to SLe<sup>c</sup> and 3'STF than to 3'SLN. A second  
465 control virus, rt-H7N7, displayed receptor-binding characteristics which are often shared by IAVs of  
466 *Charadriiformes* and *Galliformes* (Gambaryan et al., 2018; Gambaryan et al., 2012). Namely, this virus  
467 strongly bound to fucosylated receptors SLe<sup>x</sup> and 6-Su-SLe<sup>x</sup>, bound to 3'SLN better than to SLe<sup>c</sup>, and  
468 bound particularly strongly to sulfated receptors 6-Su-3'SLN and 6-Su-SLe<sup>x</sup>. R7 did not display any of  
469 these features, thus showing no signs of adaptation of the R7 HA to gulls, shorebirds or gallinaceous  
470 poultry. The binding profile of the variant R2 was similar to the profiles of R7 and mal-H3N8 and only  
471 differed from these viruses by marginally elevated avidity for 3'SLN and 3'STF. Thus, five human-type  
472 amino acid substitutions separating R2 from R7 had only minor effect on HA binding to Neu5Ac $\alpha$ 2-  
473 3Gal-terminated SGPs and did not alter a typical duck-virus-like binding specificity of the HA.

474         Substitutions L226Q and G228S in the HAs of pandemic H3N2/1968 viruses switched the viral  
475 recognition of the type of Neu5Ac-Gal linkage (Matrosovich et al., 2006b; Thompson and Paulson,  
476 2020). To determine whether and to what extent the other five substitutions in the mature HA  
477 contributed to this switch, we compared binding of HK, R5, R2 and R7 to 6'SLN and 3'SLN. High  
478 molecular mass SGPs were used to ensure measurable binding of each virus to both SGPs (Fig. 3b). As  
479 expected, comparison of R7 with R5 and comparison of R2 with HK showed that a combination of  
480 substitutions Q226L and G228S strongly reduced HA binding to 3'SLN and increased HA binding to

481 6'SLN; the magnitude of the second effect was noticeably smaller. No significant differences in the  
482 viral binding profiles were observed in pairs R7/R2 and HK/R5. These results indicated that a  
483 combination of substitutions at positions 62, 81, 92, 193 and 144 of the pandemic virus HA had much  
484 lower (if any) effect than substitutions Q226L/G228S on virus recognition of the Neu5Ac-Gal linkage  
485 type.

486

#### 487 *3.4. Effects of non-226/228 substitutions on binding avidity of the HA*

488 As limited experiments with 1-MDa SGPs (Fig. 3b) did not reveal significant differences in their  
489 binding to HK and R5, we employed more sensitive receptor-binding assays to assess effects of amino  
490 acid substitutions separating these viruses. Fig. 4a shows data on binding of HK, R5 and their point  
491 mutants to low molecular mass 6'SLN. HK bound to 6'SLN about 2-fold weaker than R5 indicating that  
492 a combination of 5 human-type amino acids decreased binding avidity. Three single-point HK mutants,  
493 HK-62, HK-81 and HK-193 displayed elevated binding avidity. Three other HK mutants, HK-92, HK-  
494 144 and HK-2, did not differ from the parental HK. Remarkably, the double mutant HK-81-63 bound to  
495 6'SLN significantly weaker than HK-81 and showed binding avidity that was comparable to that of HK.  
496 Thus, whereas substitution N81D and loss of NG<sub>81</sub> increased HA binding to 6'SLN, the substitution  
497 D63N and attachment of NG<sub>63</sub> fully compensated for this effect. The effects of human-type  
498 substitutions in R5 HA on virus binding to 6'SLN inversely correlated with the effects of corresponding  
499 avian-type substitutions in HK HA (Fig. 4a). Namely, substitutions at positions 62, 81, 193 and 63 in R5  
500 decreased binding avidity, whereas substitutions at positions -2, 92 and 144 had no significant effect.  
501 This correlation indicated that the effects of individual substitutions on HA binding to 6'SLN do not  
502 depend on the identity of the other 4 amino acids studied (that is, avian-type amino acids in R5 and

503 human-type amino acids in HK). We concluded that these amino acids are not involved in substantial  
504 epistatic interactions.

505 Because of the relatively weak binding of HK, R5 and point mutants to Neu5Ac $\alpha$ 2-3Gal-  
506 containing receptors, we could not reliably quantify binding of these IAVs to corresponding 20-kDa  
507 SGPs. Using more sensitive but less discriminative 1-MDa SGPs, we found that R5 bound stronger  
508 than HK to both 3'SLN and SLe<sup>c</sup> and that most single-point mutants did not significantly differ in this  
509 respect from the parental IAVs (Fig. 4b,c). These results suggested that single-point substitutions had a  
510 weaker effect than their combination on HA binding to 3'SLN and SLe<sup>c</sup>.

511 To further characterize receptor-binding properties of the HA mutants, we studied inhibition of  
512 viral single-cycle infection in MDCK cells in the presence of *Vibrio cholerae* sialidase which reduced  
513 levels of sialic acid receptors on the cell surface (Fig. 4d). A higher value of 50% inhibitory  
514 concentration of sialidase (IC<sub>50</sub>) suggested that the virus can infect cells expressing lower amounts of  
515 receptor moieties; this effect was interpreted as an indication of a higher binding avidity. The avidity of  
516 the viruses for receptors on MDCK cells correlated to a large extent with viral binding to 6'SLN  
517 (compare Figs. 4a and 4d). Thus, in both assays, i) R5, HK-81 and HK-193 bound to the cells stronger  
518 than HK, ii) HK-81-63 bound weaker than HK-81, iii) R5-81, R5-193 and R5-63 bound weaker than  
519 R5, iv) substitution at position -2 of the signal peptide affected binding of neither R5, nor HK. In  
520 contrast with a significant effect of substitutions atn position 62 on binding to 6'SLN (Fig. 4a), these  
521 substitutions showed no apparent effect on binding to MDCK cells. As another distinction from the  
522 6'SLN binding data, R5-92 and R5-144 bound to MDCK cells somewhat stronger than R5 and HK-144  
523 bound weaker than HK.

524 The following conclusions could be made from the binding data. A combination of human-type  
525 substitutions separating HK from R5 reduced HA binding to both Neu5Ac $\alpha$ 2-6Gal- and Neu5Ac $\alpha$ 2-

526 3Gal-containing receptors. Three of these substitutions, namely, R62I, N193S and either D81N or  
527 D63N, were primarily responsible for the reduction of binding avidity. The other three substitutions  
528 either had a weak binding-enhancing effect (N92K and A144G) or no effect [F(-2)L]).

529         The observed reduction of the avidity for human-type receptors during HA evolution from its  
530 avian precursor was unexpected. Since this result was obtained in experiments with MDCK-grown  
531 IAVs and with non-natural receptor analogues, we performed additional experiments using more natural  
532 experimental models. As shown previously, the relatively large N-glycans attached to the HA in MDCK  
533 cells could alter viral receptor-binding properties as compared to the same virus grown in another cell  
534 system (Gambaryan et al., 1998a; Inkster et al., 1993). To address this possibility, we re-grew a  
535 representative group of viruses in the human cell line Calu-3 and in differentiated cultures of primary  
536 human tracheal-bronchial epithelial cells (HTBE cultures). The Calu-3-grown HK, R5 and single-point  
537 mutants of HK displayed the same patterns of binding to 6'SLN and sialidase-treated cells  
538 (supplementary Fig. S4a,b) as did their MDCK-grown counterparts (Fig. 4a,d). The HTBE-grown HK,  
539 R5 and two glycosylation mutants R5-81 and R5-63 also showed the same relative binding avidity  
540 (supplementary Fig. S4c) as did corresponding MDCK-grown variants (Fig. 4d). These results indicated  
541 that MDCK-grown IAVs correctly represented receptor-binding phenotypes of the viruses during their  
542 replication (and glycosylation) in human epithelial cells.

543         To test whether differences in binding avidity of R5 and HK for SGPs and MDCK cells correlate  
544 with viral binding to biologically relevant receptors in humans, we studied attachment of R5 and HK to  
545 the apical surface of HTBE cultures which closely mimic structure and functions of human target cells  
546 in vivo (Davis et al., 2015; Matrosovich et al., 2004). R5 attached to HTBE cells more efficiently than  
547 HK (Fig. 5) in agreement with relative binding efficiency of these viruses to soluble 6'SLN and to  
548 MDCK cells. These results confirmed that non-226/228 human-type amino acid substitutions in the

549 precursor avian HA reduced efficiency of virus binding to receptors on airway epithelial cells in  
550 humans.

551

### 552 *3.5. Effects of non-226/228 substitutions in the HA on virus infection in MDCK cells*

553 In MDCK cells, R5 formed smaller plaques than did HK indicative of a less efficient multicycle  
554 replication of the former virus (Fig. 6). The effects of point substitutions in the HA on plaque size was  
555 studied separately for HK mutants and R5 mutants (Fig. 6). Although the resolving power of the assay  
556 was limited by substantial heterogeneity of the plaques formed by the same virus, we noticed  
557 reproducible effects of some of the point substitutions. Thus, HK-62, HK-81 and HK-193 formed  
558 smaller plaques in comparison with HK, whereas R5-92 and R5-144 formed smaller plaques in  
559 comparison with R5. For these five mutants, the reduced size of the plaques correlated with the elevated  
560 avidity of the virus for either 6' SLN (HK-62), MDCK cells (R5-92, R5-144), or both substrates (HK-  
561 81, HK-193) (compare Fig. 6 and Fig. 4). We previously studied dependence of replication efficiency of  
562 IAVs on their binding avidity and demonstrated that excessive avidity slowed down the release of viral  
563 progeny from infected cells and spread of the infection (Gambaryan et al., 1998b). We assume that the  
564 same mechanism explains, at least in part, the smaller plaque size of the mutants of HK and R5  
565 containing avidity-enhancing substitutions.

566

### 567 *3.6. Effects of non-226/228 substitutions on virus infection in HTBE cultures*

568 Paulson and colleagues postulated that changes in receptor-binding properties of avian IAVs  
569 during their adaptation to humans may serve to increase virus binding to and infection of human airway  
570 epithelial cells and to minimize its binding to and neutralization by respiratory mucus (Baum and  
571 Paulson, 1990; Couceiro et al., 1993). To determine whether non-226/228 substitutions in the HA



572 contributed to these effects, we inoculated differentiated HTBE cultures with either R5 or HK and  
573 determined the numbers of infected cells 8 h post-infection. To focus on the role of virus interaction  
574 with receptors on cells, the cultures were extensively washed prior to infection to remove accumulated  
575 mucins. In parallel, replicate cultures were infected in the presence of the endogenous mucins. Less  
576 cells were infected with HK than with R5 in the mucus-deprived cultures (Fig. 7a), this effect agreed  
577 with the higher binding avidity of R5 for receptor analogues and HTBE cells (Figs. 4 and 5). As  
578 expected, the presence of HTBE mucins reduced infectivity of both viruses, with HK still infecting less  
579 cells than R5. The mean percentages of cells infected in the presence of mucins with respect to the  
580 infection without mucins were 15.1% for HK and 17.2% for R5, and the difference was not statistically  
581 significant. Thus, our results suggested that substitutions separating HK from R5 reduced efficiency of  
582 entry of HK into human airway epithelial cells and that these substitutions did not make HK less  
583 sensitive than R5 to neutralization by human airway mucins.

584         Reduced infectivity of HK compared to R5 in HTBE cultures was in apparent inconsistency with  
585 our previous observation of more efficient multicycle replication of HK in this cell system (Van Poucke  
586 et al., 2015). We therefore compared single- and multicycle replication of HK and R5 in the same  
587 experiment (Fig. 7b). This experiment confirmed that R5 infected more cells in the first round of  
588 infection in HTBE cultures, whereas HK produced more viral progeny after multiple infection cycles.  
589 To infer which of the substitutions separating HK from R5 contributed to more efficient multicycle  
590 replication of HK in HTBE cultures, we compared replication of HK and its single-point mutants under  
591 competitive conditions. In the first experiment (Fig. 8), we focused on substitutions at positions 81 and  
592 193 as they showed the major effect on receptor-binding properties of HK and R5. We also studied the  
593 substitution at position 63, because it affected HA glycosylation, showed the same phenotypic effect as  
594 did substitution 81 and could have served the same function in Memphis/1968-like IAVs as did

595 substitution 81 in Hong Kong/1968 IAVs. HTBE cultures were inoculated with 1:1 mixtures of the  
596 IAVs differing by single substitutions based on viral infectious titers in MDCK cells. The viral progeny  
597 was collected daily from the apical sides of the cultures, and compositions of the original inoculum and  
598 the harvests from day 2 and day 4 were determined by Sanger sequencing. Replication of the mixture of  
599 HK with HK-81 resulted in the enrichment of viral progeny with HK (Fig. 8a). Accordingly, replication  
600 of the mixture of HK-81-63 with its avian-type precursor HK-81 was enriched with the former virus  
601 (Fig. 8c). These results indicated that the human-type amino acid substitutions D81N, D63N and/or  
602 accompanying addition of N-glycan increased virus fitness in HTBE cultures. No significant changes in  
603 the composition of the HK mixture with the HK-193 mutant was observed after its replication (Fig. 8b)  
604 indicating that substitution at position 193 had no detectable effect on viral fitness.

605 We next studied simultaneous competition of seven IAVs, HK and its six single-point HA  
606 mutants. Equivalent amounts of plaque-forming units of the viruses were mixed, and three different  
607 dilutions of this mixture were inoculated into the HTBE cultures. The first group of cultures (group L)  
608 received 5 PFU of each of the seven viruses per culture, two other groups received 20 and 320 PFU per  
609 culture (groups M and H, respectively). The viral progeny was harvested 3 days post inoculation, and  
610 the proportions of the HA gene segments with avian-type substitutions were analyzed in the harvests by  
611 next generation sequencing (Fig. 9). HA segments of all 6 mutants were present in the harvests from all  
612 cultures in the group H. By contrast, the harvests in the group M and, especially, group L were highly  
613 heterogeneous, with proportions of the mutants varying between 0.00 and 1.00. The proportions of three  
614 mutants, HK-62, HK-81, and HK-144 were significantly reduced in the harvests L as compared to their  
615 proportions in the inoculated mixture. The mutants HK-81 and HK-144 also displayed reduced  
616 frequencies in the group H. No statistically significant changes with respect to the inoculum were  
617 observed in the case of HK-92 and HK-193. In contrast with other mutants, the proportion of HK-2 was

618 higher in the harvests than in the inoculum for all three infection doses used. These results indicated that  
619 i) HK-2 replicates more efficiently than the other mutants, ii) HK-62, HK-81, and HK-144 replicate less  
620 efficiently than the other mutants, and iii) HK-92 and HK-193 have intermediate replication efficiency.

621         Whereas the mutated genotypes of HK were unambiguously identified in the mixtures via  
622 unique nucleotide substitutions, the amount of the parent HK could not be directly quantified by  
623 sequencing. We therefore inferred proportions of HK in the mixtures by subtracting proportions of the  
624 mutants from the theoretical value of 1. Because of the intrinsic high errors of this approach, the data  
625 could not be analyzed statistically. One can see, however, that the proportion of HK in the harvests  
626 increased with respect to the inoculum and that the frequency in the group L was higher than in the  
627 group H. Obviously, a higher number of viral replication cycles in group L than in groups M and H was  
628 responsible for a higher enrichment of the mixture by the best-fit virus. Remarkably, this pattern of HK  
629 resembled the pattern shown by HK-2 and differed from the patterns displayed by 5 other mutants. In  
630 this view and taking into account that HK-2 mutant did not differ from HK in most phenotypic assays,  
631 we assume that HK-2 has the same fitness as does HK. Collectively, we conclude from the replication  
632 experiments in HTBE cultures that avian-type substitutions at positions 62, 63, 81 and 144 decrease in-  
633 vitro fitness of the pandemic virus, substitution at position -2 has no effect on fitness, and that effects of  
634 substitutions 92 and 193 (if any) were not statistically significant under assay conditions.

635

### 636 *3.7. Airborne transmission of HK and R5 in ferrets*

637         Transmission through the air is essential for the pandemic spread of IAVs in humans. To  
638 evaluate effects of non-226/228 substitutions in the HA of the 1968 pandemic viruses on  
639 transmissibility, we employed the ferret airborne transmission model. To avoid potential undesirable  
640 effects of the PR8-derived gene segments on viral fitness in ferrets, recombinant HK and R5 containing

641 all 8 gene segments of A/Hong Kong/1/1968 were used in the transmission experiments. All directly  
642 inoculated ferrets shed the viruses from the nose and throat starting from day 1 after infection, the  
643 duration of shedding and peak titers did not significantly differ between HK and R5 (Fig. 10). Two of  
644 the airborne contact ferrets in the HK group became infected and shed the virus in high titers starting  
645 from the day 3 after the contact, the third contact ferret produced one virus-positive swab on the day 3.  
646 All four contact animals in the HK group seroconverted. In the R5 group, only one of four contact  
647 animals shed the virus and seroconverted. We sequenced the HA of the transmitted HK and R5 viruses  
648 present in the throat swabs of all positive indirect contact animals at 3 days post exposure and found no  
649 substitutions. Although only small numbers of animals were used in the transmission studies, a careful  
650 interpretation of these results indicated that R5 transmitted less efficiently than HK, although not  
651 significant, suggesting that substitutions other than those at the RBS were required for efficient  
652 transmission of HK virus. Although it was tempting to study effects of individual substitutions  
653 separating HK and R5 on virus transmissibility, these studies were not pursued for ethical reasons given  
654 the small differences in transmissibility of parental viruses and, hence, necessity to use large groups of  
655 animals for statistically significant detection of even smaller effects.

656

### 657 *3.8. Analysis of H3 HA sequences in different viral host species*

658 The H3 HA sequences available from the GISAID EpiFlu database include sequences of avian  
659 IAVs (predominantly from wild aquatic birds) and of several stable mammalian-adapted viral lineages  
660 that emerged from the avian reservoir via interspecies transmission (Fig. 11a, supplementary Fig. S5).  
661 Among them, the H3N8 equine IAVs were first recognized in 1963 (Webster et al., 1992); they  
662 continuously circulate and evolve in horses until now. The IAVs of an independent H3N8 equine  
663 lineage caused epizootic in China in 1989, circulated in horses for a few years and became extinct (Guo

664 et al., 1995). Only one virus of this lineage, A/equine/Jilin/1/1989, was sequenced. The first of two  
665 canine H3 lineages originated from a contemporary equine H3N8 virus in Florida around 2003; the  
666 second canine lineage (H3N2) emerged from an avian precursor in Asia and was first recognized in  
667 2006 [for reviews, see (Parrish et al., 2015; Yoon et al., 2014)]. In addition to stable mammalian-  
668 adapted lineages, the database contains a small number of IAVs isolated from mammals which cluster  
669 with avian viruses and do not form persistent mammalian lineages (supplementary Fig. S5). The human  
670 H3N2 lineage includes H3N2/1968 pandemic viruses and their permanently evolving descendants that  
671 cause seasonal influenza epidemics. Finally, multiple lineages of H3N2 swine IAVs all originated from  
672 independent human-to-swine transmissions of seasonal IAVs followed by evolution in pigs (Anderson  
673 et al., 2020).

674 We analysed prevalence of specific amino acids at nine HA positions in question in avian IAVs  
675 and IAVs of different mammalian lineages (Fig. 11b, supplementary Tab. S1, supplementary Figs. S5  
676 and S6). We also estimated selective pressures on these positions in different hosts using codon-based  
677 likelihood methods FEL, Contrast-FEL and MEME, which compare rates of synonymous and non-  
678 synonymous substitutions (Kosakovsky Pond and Frost, 2005; Kosakovsky Pond et al., 2021; Murrell et  
679 al., 2012), and DEPS/FADE to identify directional evolution along human internal branches  
680 (Kosakovsky Pond et al., 2008) (Tab.1). Finally, we compared HA sequences of the earliest equine and  
681 canine isolates with sequences of their closest avian counterparts to identify potential amino acid  
682 substitutions at 9 HA positions and their correlation with substitutions in the H3N2/1968 pandemic  
683 viruses (Tab. 2, supplementary Fig. S5). Human-origin swine viruses were not included in the latter two  
684 analyses as we were interested in the avian-to-mammalian shifts. The results of these studies are  
685 summarized below.

686            Position -2. FEL predicts that this position is under pervasive negative selection ( $dN/dS = 0.49$ )  
687 in avian IAVs; the site exhibits a large number of substitutions (both synonymous and non-  
688 synonymous) on avian branches (see supplementary Fig S6). No significant selection effects were  
689 detected by other likelihood methods (Tab. 1). Amino acids F and L are typically present at this position  
690 in the HAs of avian, human and swine IAVs (Fig. 11b, supplementary Figs. S5 and S6). The earliest  
691 isolates of the A/equine/Miami/1963-like (H3N8) IAVs had H in position -2, whereas closest avian  
692 IAVs carry F, L and Y (Tab. 2, supplementary Figs. S5 and S6). However, given a significant  
693 divergence of this equine lineage from other IAVs, the identities of amino acids at HA position -2 of an  
694 avian precursor and first equine-adapted variants remain unclear. No changes at this position occurred  
695 during emergence of other mammalian lineages. Collectively, these analyses provided no indications of  
696 the association of the substitution F(-2)L with viral host range and interspecies transmission.

697            Position 62. The codon is negatively selected in birds overall (FEL) with 99.3% of analysed  
698 avian HAs containing R<sub>62</sub> (supplementary Tab. S1). Contrast-FEL detects a higher  $dN/dS$  in human  
699 IAVs compared to avian IAVs; the point estimate of  $dN/dS$  in humans is 1.57, but this is not  
700 significantly different from 1. This finding is consistent with the location of the amino acid in the  
701 antibody-binding site E of the H3 HA (Wiley and Skehel, 1987) and its evolution under immune  
702 selection pressure in humans. In fact, all positions analysed here, with the exclusion of position -2, are  
703 also located in the antibody-binding sites A (residue 144), B (193), D (226, 228) and E (62,63,81,92).  
704 Avian-type R<sub>62</sub> is conserved among canine and most equine IAVs, with conservative substitution R to K  
705 in equine viruses isolated after 2008 (Fig. 11b, supplementary Figs. S5 and S6). The H3N2/1968  
706 pandemic viruses acquired non-conservative substitution R62I. Another independent host switch event,  
707 transmission of an avian IAV to horses in Asia in 1989, was also accompanied by non-conservative  
708 substitution R62G (Tab. 2). Two independent non-conservative substitutions of conserved avian-type

709 residue R<sub>62</sub> suggest potential adaptive role of these substitutions during avian-to-mammalian  
710 transmission.

711 Positions 63 and 81. Avian HAs contained D<sub>63</sub> and D<sub>81</sub> in 98.3% and 98.6% of analysed  
712 sequences, respectively (Fig. 11b, supplementary Tab. S1). Both codons are negatively selected in birds  
713 overall (FEL). The substitution from D to N at either position 63 or position 81 of two co-circulating  
714 pandemic virus lineages generated glycosylation sites. Remarkably, the substitution D<sub>63</sub>N and  
715 acquisition of glycosylation site accompanied emergence of both equine IAV lineages, whereas  
716 substitution D<sub>81</sub>N with new glycosylation site occurred during transmission of an avian H3N2 virus to  
717 dogs (Tab. 1). The glycosylation sites became fixed in H3N8 equine and H3N2 canine lineages,  
718 moreover, the equine-origin H3N8 canine and human-origin H3N2 swine IAVs inherited and preserved  
719 the glycosylation sites of their mammalian precursors. As a result, all known mammalian IAVs with H3  
720 HA differ from H3 avian IAVs by the presence of N-glycan at either position 63 or position 81 (Fig.  
721 11b, supplementary Figs. S2, S5 and S6). Observed parallel evolution of amino acids at positions 63 and  
722 81 during avian-to-mammalian adaptation represents a strong indication of their adaptive role in  
723 H3N2/1968 pandemic IAVs. There is evidence of directional evolution towards N on the human  
724 branches at site 63. Furthermore, substitution D<sub>81</sub>Y occurred in both H3N8 equine lineages. Thus,  
725 alteration of the properties of amino acid in position 81 may play an adaptive role in interspecies  
726 transmission irrespectively from and/or in addition to the effect of the substitution on HA glycosylation.

727 Position 92. Avian IAVs contain either N<sub>92</sub> or S<sub>92</sub>. The codon is negatively selected in birds  
728 overall (FEL, dN/dS = 0.504) (Tab. 1). Whereas none of the avian HA sequences contained K<sub>92</sub>, non-  
729 conservative substitution N<sub>92</sub>K altering change of the amino acid side chain accompanied emergence of  
730 the pandemic IAVs. Of note, this substitution is located in the close proximity of another charged  
731 human-type substitution R<sub>62</sub>I (see Fig. 1b) and could compensate for the effect of the latter substitution

732 on the net surface charge of the protein in this area. No substitutions in position 92 occurred during  
733 emergence of other stable mammalian lineages, however, conservative substitution N92S was present in  
734 H3N8 IAVs that caused epizootic with cases of fatal pneumonia in New England harbour seals in 2011  
735 (Anthony et al., 2012) (Tab.2, supplementary Fig. S5). Along the human branches, there is evidence of  
736 directional selection towards T, with two clades showing N→T substitutions which were then  
737 maintained.

738 Position 144. In accord with location of the amino acid in the antigenic site, codon 144 is under  
739 positive selection in humans (FEL dN/dS = 3.04, and MEME). dN/dS on human branches is  
740 significantly higher than on the avian branches (Contrast-FEL). Avian IAVs typically contain A, I, or V  
741 but never G. By contrast, the H3N2/1968 pandemic IAVs carried a non-conservative substitution  
742 A144G, which could affect the structure of polypeptide loop 140-145 located in the vicinity of the RBS.  
743 These notions suggest potential functional significance of this substitution for the avian-to-human  
744 adaptation. There is no evidence of parallel evolution at this site in other instances of avian-to-  
745 mammalian transmissions (Tab. 2).

746 Position 193. This amino acid is located at the upper rim of the RBS. The codon is predicted to  
747 be under negative selective pressure in horses and dogs, but not in other species (Tab. 1). Avian HAs  
748 contain N and, less frequently, S or D. Unique substitutions to K<sub>193</sub> and E<sub>193</sub> occurred during  
749 independent transmissions of avian precursors to horses (A/equine/Miami/1963-like lineage and  
750 A/equine/Jilin/1/1989-like lineage); conservative substitution N-to-S was found in H3N3 avian-like  
751 IAVs isolated from seals in 1992 (Tab. 2, supplementary Fig. S5). These findings suggest a potential  
752 functional role of the substitution in position 193 during interspecies transmission.

753 Amino acids Q<sub>226</sub> and G<sub>228</sub> are critical for the avian HA binding to avian-type receptor motif  
754 Neu5Acα2-3Gal (Gamblin et al., 2020; Matrosovich et al., 2006b; Shi et al., 2014). Both codons are



755 under purifying selection in birds, horses and dogs, which share binding preference for Neu5Ac $\alpha$ 2-  
756 3Gal-terminated receptors. By contrast, the codon 226 is under pervasive and episodic positive selection  
757 in humans (FEL dN/dS = 6.98, MEME), and significantly higher dN/dS in humans compared to both  
758 avian and mammalian lineages.

759

760

#### 761 **4. Discussion**

762 Unavailability of immediate animal precursors of pandemic IAVs hampers understanding of  
763 genetic and phenotypic changes in the HA that were essential for the viral animal-to-human adaptation  
764 and pandemic spread. To mitigate this problem, we generated and characterized the recombinant IAV  
765 R7 containing the HA of the hypothetical most recent common ancestor of H3 avian and H3N2/1968  
766 pandemic IAVs. R7 displayed receptor-binding profile typical for duck viruses and differed in this  
767 respect from IAVs perpetuated by gulls, shorebirds and gallinaceous land-based poultry. The HA of R7  
768 showed high conformational stability and low pH optimum of fusion compatible with the aquatic bird  
769 origin of the H3N2/1968 HA (Baumann et al., 2016; Scholtissek, 1985). These properties of R7 agreed  
770 with the hypothesis that the H3N2/1968 pandemic IAVs originated from a duck virus (Bean et al., 1992;  
771 Kida et al., 1987). IAVs with the HA sequences highly similar to R7 were isolated from both wild  
772 migratory ducks captured on a Pacific flyway in Japan and domestic ducks in Southern China (Kida et  
773 al., 1987; Yasuda et al., 1991) (supplementary Fig. S1b). It seems likely that the precursor wild duck  
774 virus was transmitted to humans via domestic ducks either with or without additional intermediate host  
775 species.

776 The HAs of all four characterized pandemic IAVs (H1N1/1918, H2N2/1957, H3N2/1968 and  
777 H1N1/2009) were relatively stable, whereas swine IAVs, highly pathogenic H5 and H7 IAVs from  
778 gallinaceous poultry and some IAVs of aquatic birds display low conformational stability (Baumann et

779 al., 2016; Galloway et al., 2013; Russell et al., 2018). These observations suggested that adaptation of  
780 animal IAVs to humans may require stabilizing substitutions in the HA (Russell et al., 2018; Russier et  
781 al., 2016), however, it remained unclear whether this mechanism contributed to the emergence and  
782 initial pandemic spread of any known pandemic virus. We found that the HA of HK was in fact slightly  
783 less stable than the precursor HA of R7 with a  $pH_{50}$  of conformational transition of 5.4 and 5.25,  
784 respectively (Fig. 2). Reduced HA stability of HK was primarily associated with substitutions at  
785 positions 226 and 228; substitutions at other HA positions had lower if any effects. Thus, the duck  
786 precursor of the H3N2/1968 IAVs had a sufficiently stable HA and was able to adapt to humans without  
787 elevation of its conformational stability.

788 Analysis of the receptor-binding specificity of HK and its HA variants (Fig. 3b) confirmed the  
789 concept that preferential binding of the H3N2/1968 viruses to Neu5Ac $\alpha$ 2-6Gal-terminated receptors is  
790 primarily determined by substitutions Q226L and G228S (Connor et al., 1994; Matrosovich et al.,  
791 2000). The combination of other human-type substitutions in the HA decreased binding of HK to both  
792 Neu5Ac $\alpha$ 2-6Gal- and Neu5Ac $\alpha$ 2-3Gal-terminated receptor analogues, reduced its attachment to apical  
793 surfaces of HTBE cultures and lowered infectivity for HTBE cells without affecting efficiency of virus  
794 neutralization by human airway mucus (Figs. 4,5 and 7). These results indicated that non-226/228  
795 substitutions lowered the avidity of HA binding to receptors on human target cells. Although HK  
796 infected less cells than R5 during initial inoculation into the HTBE cultures, HK produced more  
797 infectious virus particles after multicycle replication (Fig. 7), suggesting that it outperforms R5 during  
798 post-entry replication stage(s). The reduced binding avidity can increase fitness of HK by facilitating  
799 release of viral progeny from cells and preventing its receptor-mediated self-aggregation (Gambaryan et  
800 al., 1998b; Kaverin et al., 2000). In addition, some of the non-226/228 substitutions could, in principle,  
801 promote replication of HK relative to R5 by avidity-independent mechanisms, such as facilitation of

802 synthesis and intracellular processing of the HA protein or assembly of virus particles. Further studies  
803 are needed to clarify potential roles of these mechanisms.

804 Our observation of reduced HA avidity of H3N2/1968 IAVs is in line with the observed lower  
805 avidity of the HA of swine-origin H1N1/2009 pandemic IAV as compared to its closest available swine  
806 counterparts (de Vries et al., 2011; Xu et al., 2012). The NA catalytic activity of H1N1/2009 was also  
807 lower than that of swine IAV NAs (Xu et al., 2012), in agreement with the concept that a functional  
808 balance between HA and NA is essential for efficient replication and transmission of IAVs (de Vries et  
809 al., 2020; Wagner et al., 2002). The H3N2/1968 pandemic virus was a reassortant containing the H3 HA  
810 of an avian parent and the N2 NA of a human parent. This NA differed from typical avian N2 NAs by  
811 substrate specificity (Baum and Paulson, 1991; Kobasa et al., 1999) and by substitutions in the second  
812 sialic acid binding site that reduced catalytic activity (Du et al., 2019; Uhlendorff et al., 2009). We  
813 speculate that the reduction of binding avidity of the avian-origin HA of the H3N2/1968 IAVs could  
814 have simplified its functional match with the human-origin NA.

815 Reduced avidity of the HK HA was primarily associated with the avian-to-human substitutions  
816 R62I, N193S and either D81N or D63N (Fig. 4). The substitution R62I is located relatively far from the  
817 receptor binding site and decreases the local and the net positive charges of the HA. The negative effect  
818 of this substitution on binding avidity could be partially associated with the reduction of electrostatic  
819 attraction of IAV particles to negatively charged soluble sialoglycans and cell membranes (Gambaryan  
820 et al., 1998b; Hensley et al., 2009). Amino acid 193 is located at the upper rim of the receptor-binding  
821 site. Charged substitutions at this position, such as N/S → K/D, were shown to affect receptor-binding  
822 properties of avian and equine viruses with different HA subtypes (Gambaryan et al., 2018; Gambaryan  
823 et al., 2012; Matrosovich et al., 2000; Medeiros et al., 2004; Peng et al., 2018). In the crystal structures  
824 of the avian H5 HA and canine H3 HA complexed with avian-type receptor glycans 6-Su-3'SLN and 6-

825 Su-SLe<sup>x</sup>, the side chain of K<sub>193</sub> interacts with the sulfogroup attached to GlcNAc-3 (Collins et al., 2014;  
826 Xiong et al., 2013). In the H3N2/1968 HA complexes with human-type receptor analogues LSTc and  
827 6SLN-LN, the side chain of S<sub>193</sub> contacts the Gal-4 residue of the glycan (Eisen et al., 1997; Wu and  
828 Wilson, 2020). These observations suggest that substitution N193S affects binding avidity of HK by  
829 altering HA interactions with sub-terminal saccharide residues of both avian-type and human-type  
830 receptor glycans. The N-glycans on the HA globular head typically decrease binding avidity with the  
831 effect being dependent on glycan structure and location with respect to the receptor-binding site [for  
832 review, see (Matrosovich et al., 2006b)]. Substitutions D81N and D63N are located in the same area of  
833 the HA and result in addition of structurally similar complex type N-linked glycans containing up to 4  
834 antennae (An et al., 2015). We assume that bulky NG<sub>63</sub> and NG<sub>81</sub> either reach the lower rim of the RBS  
835 and directly interfere with HA-receptor interactions or have some yet undefined allosteric negative  
836 effect on binding.

837         The essential role of HA substitutions Q226L and G228S in the emergence of H2N2/1957 and  
838 H3N2/1968 pandemic IAVs is well established. To test whether other substitutions separating the HA of  
839 HK from its avian precursor were at all required for the avian-to-human adaptation, we compared  
840 transmission of HK and R5 via airborne droplets in ferrets, the currently preferred animal model for  
841 prediction of IAV replication and transmissibility in humans (Belser et al., 2018). R5 transmitted less  
842 efficiently than HK (Fig. 10) supporting the concept that some of the non-226/228 substitutions in the  
843 HA contributed to the human adaptation and pandemic spread of H3N2/1968 IAVs (Van Poucke et al.,  
844 2015). Unfortunately, the low statistical power of the current ferret transmission model with small group  
845 sizes did not allow us to study effects of individual substitutions on virus fitness and transmissibility.  
846 Additional experiments are needed to address this question, for example, analyses of virus replication

847 and transmission in ferrets assisted by deep mutational scanning of the positions of interest (Soh et al.,  
848 2019). Alternatively, improved methods to assess virus transmissibility need to be developed.

849 To rank the substitutions in the order of their potential importance for the avian-to-human  
850 adaptation of the H3N2/1968 HA we took into account various adaptation-related characteristics, such  
851 as significant effect of the substitution on the HA phenotype, its location in the functional region of the  
852 HA, and dissimilar patterns of evolution of corresponding positions in birds and mammals (Tab. 3).

853 The substitutions Q226L/G228S displayed the maximal total score in such combined analysis,  
854 supporting the validity of this approach. Among the non-226/228 substitutions, D63N and D81N  
855 showed the highest score. Moreover, these HA positions were characterized by a remarkable parallel  
856 evolution during interspecies transmission events (Fig. 11, Tab. 2, supplementary Figs. S5,S6). In the  
857 context of HK HA, either substitution reduced the binding avidity and slightly elevated the pH optimum  
858 of viral fusion within endosomes (Fig. 4, supplementary Fig. S3). However, it seems unlikely that these  
859 effects alone could explain addition of a novel N-glycan in all independent cases of avian H3 HA  
860 adaptation to such distinctive hosts as humans, dogs and horses. It is also unlikely that NG<sub>63</sub>/NG<sub>81</sub>  
861 served to mask HA antigenic epitopes, given a lack of herd immunity in mammals during emergence  
862 and initial epidemic spread of a novel IAV. The HA of the HK-like strains A/X31 and A/Aichi/2/1968  
863 containing NG<sub>81</sub> was often used as a model in the general research on the role of N-glycans in protein  
864 folding, quality control and intracellular transport (Daniels et al., 2003; Gallagher et al., 1992; Hebert et  
865 al., 1997). These studies showed that folding, formation of disulfide bonds and quality control of the  
866 nascent HA chain in the ER is largely regulated by concerted interactions of N-glycans attached in  
867 critical HA regions with lectin chaperones calnexin and calreticulin. NG<sub>81</sub> was found to engage  
868 calreticulin, and point mutants lacking NG<sub>81</sub> displayed delay in folding due to a less efficient formation  
869 of the critical intrachain disulfide bond C64-C76 located in vicinity of this glycan (Daniels et al., 2003;

870 Hebert et al., 1997). We therefore hypothesize that the addition of either NG<sub>81</sub> or the structurally  
871 equivalent NG<sub>63</sub> increases fitness of avian-origin HA in mammals by ensuring its interactions with  
872 mammalian chaperones. Of note, two other pandemic viruses, H1N1 from 1918 and 2009, contained  
873 NG<sub>94</sub> in the same area of the HA. Although fitness-enhancing mechanisms of substitutions D63N/D81N  
874 remain to be fully characterized, we conclude that these substitutions represent a previously  
875 unrecognized important marker of avian-to-mammalian adaptation and pandemic potential of IAVs.

876         The relative importance of the other substitutions for the adaptation is less clear. R62I shows a  
877 high score (Tab. 3) and represents particular interest because it reduces HA avidity, increases viral  
878 replicative fitness in MDCK cells and HTBE cultures and because codon 62 displays distinctive  
879 evolution in avian and mammalian IAVs. Substitutions N193S and A144G are located in the  
880 functionally important region on the opposite rims of the RBS, show phenotypes in receptor-binding  
881 assays and could serve to fine-tune HA interactions with receptors in humans. The substitution F(-2)L in  
882 the signal peptide was neutral in most phenotypic and genotypic analyses performed, however, this  
883 substitution showed weak effect on viral membrane fusion activity, thus deserving attention in the  
884 future studies.

885         The research on mammalian adaptation of avian IAVs was strongly stimulated and advanced by  
886 two independent reports on HA substitutions that allowed airborne transmission of avian H5N1 IAVs in  
887 ferrets (Herfst et al., 2012; Imai et al., 2012). In each study, two substitutions in the RBS changed HA  
888 binding preference from Neu5Ac $\alpha$ 2-3Gal motif to Neu5Ac $\alpha$ 2-6Gal motif, one substitution removed N-  
889 glycan from the tip of the HA thus increasing binding avidity and one substitution increased HA  
890 conformational stability. Remarkably, apart from the alteration of the Neu5Ac-Gal linkage specificity,  
891 other ferret-adaptation changes in the H5N1 HA (alterations of HA avidity, stability and N-  
892 glycosylation) are discordant with the changes that accompanied emergence of the pandemic

893 H3N2/1968. This discrepancy can be explained, at least in part, by the differences between properties of  
894 poultry-adapted H5N1 IAVs and duck-origin precursor of H3N2/1968 and between factors required for  
895 airborne transmission in ferrets and pandemic spread in humans. In any case, our results highlight the  
896 importance of the studies on previous pandemic IAVs for the influenza risk assessment and  
897 preparedness.

898

### 899 **Supplementary materials**

900 **Supplementary Method.** Construction of a GAMLSS model to analyse the frequency of  
901 observation of the HA mutants in the competitive replication assay.

902 **Supplementary Table S1.** Prevalence of amino acids at indicated positions of the H3 HA of  
903 avian IAVs

904 **Supplementary Table S2.** Originating and submitting laboratories of the sequences from  
905 GISAID's EpiFlu™ Database on which this research is based.

906 **Supplementary Fig. S1.** Inference of amino acid substitutions separating HAs of H3N2/1968  
907 pandemic IAVs from their avian ancestor.

908 **Supplementary Fig. S2.** Evolution of glycosylation site at HA positions 63 and 81 of human  
909 H3N2 IAVs.

910 **Supplementary Fig. S3.** Conformational stability and membrane-fusion properties of the  
911 HA point mutants of HK and R5.

912 **Supplementary Fig. S4.** Receptor-binding properties of HK, R5 and their mutants grown  
913 in Calu-3 cells and HTBE cultures.

914 **Supplementary Fig. S5.** Variation of amino acids at 9 positions of H3 HA during  
915 evolution in different host species.

916 **Supplementary Fig. S6.** Amino-acid composition at the nine sites of H3 HA.

917

918 **Acknowledgements**

919 We thank Earl Brown for A/Hong Kong/1/1968 (H3N2) and Robert Webster and Richard  
920 Webby for avian influenza viruses and pHW2000 and PR8 plasmids. We gratefully acknowledge  
921 GISAID Initiative and all authors from the originating and submitting laboratories of the sequences in  
922 the GISAID's EpiFlu Database on which part of this research is based. The list is detailed in the  
923 supplementary Table S2.

924 This work was supported by the European Union's Seventh Framework Programme for  
925 Research, Technological Development, and Demonstration under grant agreement 278433-  
926 PREDEMICS, by the Deutsche Forschungsgemeinschaft (DFG, German Research Foundation) - Project  
927 number 197785619 – SFB 1021, by an NWO VIDI grant (contract number 91715372) and by  
928 NIH/NIAID contract HHSN272201400008C. Johanna West was supported by a fellowship from the  
929 Jürgen Manchot Stiftung, Düsseldorf, Germany.

930

931 **Author contributions**

932 **Conceptualization:** Hans-Dieter Klenk, Mikhail Matrosovich

933 **Formal Analysis:** Gianpiero Zamperin, Michele Gastaldelli, Francesco Bonfante, Jochen Wilhelm,  
934 Mikhail Matrosovich

935 **Funding Acquisition:** Johanna West, Sander Herfst, Ron Fouchier, Mikhail Matrosovich

936 **Investigation:** Johanna West, Juliane Röder, Tatyana Matrosovich, Jana Beicht, Jan Baumann, Nancy  
937 Mounogou Kouassi, Jennifer Doedt, Annalisa Salviato, Sergei Kosakovsky Pond, Sander Herfst



938 **Methodology:** Gianpiero Zamperin, Michele Gastaldelli, Francesco Bonfante, Sergei Kosakovsky  
939 Pond, Sander Herfst, Ron Fouchier, Jochen Wilhelm, Mikhail Matrosovich  
940 **Resources:** Nicolai Bovin  
941 **Supervision:** Mikhail Matrosovich  
942 **Visualization:** Johanna West, Sergei Kosakovsky Pond, Sander Herfst, Jochen Wilhelm, Mikhail  
943 Matrosovich  
944 **Writing – Original Draft:** Johanna West, Mikhail Matrosovich  
945 **Writing – Review & Editing:** Johanna West, Nicolai Bovin, Francesco Bonfante, Sergei Kosakovsky  
946 Pond, Sander Herfst, Ron Fouchier, Jochen Wilhelm, Hans-Dieter Klenk, Mikhail Matrosovich  
947  
948

949 **References**

- 950
- 951 An, Y., McCullers, J.A., Alymova, I., Parsons, L.M., Cipollo, J.F., 2015. Glycosylation analysis of  
952 engineered H3N2 influenza A virus hemagglutinins with sequentially added historically relevant  
953 glycosylation sites. *J Proteome Res* 14, 3957-3969.
- 954 Anderson, T.K., Chang, J., Arendsee, Z.W., Venkatesh, D., Souza, C.K., Kimble, J.B., Lewis, N.S.,  
955 Davis, C.T., Vincent, A.L., 2020. Swine influenza A viruses and the tangled relationship with  
956 humans. *Cold Spring Harb Perspect Med*, a038737.
- 957 Anthony, S.J., St Leger, J.A., Pugliares, K., Ip, H.S., Chan, J.M., Carpenter, Z.W., Navarrete-Macias, I.,  
958 Sanchez-Leon, M., Saliki, J.T., Pedersen, J., Karesh, W., Daszak, P., Rabadan, R., Rowles, T.,  
959 Lipkin, W.I., 2012. Emergence of fatal avian influenza in New England harbor seals. *mBio* 3,  
960 e00166-00112.
- 961 Bateman, A.C., Busch, M.G., Karasin, A.I., Bovin, N., Olsen, C.W., 2008. Amino acid 226 in the  
962 hemagglutinin of H4N6 influenza virus determines binding affinity for alpha2,6-linked sialic acid  
963 and infectivity levels in primary swine and human respiratory epithelial cells. *J Virol* 82, 8204-8209.
- 964 Baum, L.G., Paulson, J.C., 1990. Sialyloligosaccharides of the respiratory epithelium in the selection of  
965 human influenza virus receptor specificity. *Acta Histochem Suppl* 40, 35-38.
- 966 Baum, L.G., Paulson, J.C., 1991. The N2 neuraminidase of human influenza virus has acquired a  
967 substrate specificity complementary to the hemagglutinin receptor specificity. *Virology* 180, 10-15.
- 968 Baumann, J., Kouassi, N.M., Foni, E., Klenk, H.D., Matrosovich, M., 2016. H1N1 swine influenza  
969 viruses differ from avian precursors by a higher pH optimum of membrane fusion. *J Virol* 90, 1569-  
970 1577.
- 971 Bean, W.J., Schell, M., Katz, J., Kawaoka, Y., Naeve, C., Gorman, O., Webster, R.G., 1992. Evolution  
972 of the H3 influenza virus hemagglutinin from human and nonhuman hosts. *J Virol* 66, 1129-1138.
- 973 Belser, J.A., Barclay, W., Barr, I., Fouchier, R.A.M., Matsuyama, R., Nishiura, H., Peiris, M., Russell,  
974 C.J., Subbarao, K., Zhu, H., Yen, H.L., 2018. Ferrets as models for influenza virus transmission  
975 studies and pandemic risk assessments. *Emerg Infect Dis* 24, 965-971.
- 976 Byrd-Leotis, L., Cummings, R.D., Steinhauer, D.A., 2017. The interplay between the host receptor and  
977 influenza virus hemagglutinin and neuraminidase. *International journal of molecular sciences* 18,  
978 1541.
- 979 Collins, P.J., Vachieri, S.G., Haire, L.F., Ogradowicz, R.W., Martin, S.R., Walker, P.A., Xiong, X.,  
980 Gamblin, S.J., Skehel, J.J., 2014. Recent evolution of equine influenza and the origin of canine  
981 influenza. *Proc.Natl.Acad.Sci.U.S.A* 111, 11175-11180.
- 982 Connor, R.J., Kawaoka, Y., Webster, R.G., Paulson, J.C., 1994. Receptor specificity in human, avian,  
983 and equine H2 and H3 influenza virus isolates. *Virology* 205, 17-23.
- 984 Cotter, C.R., Jin, H., Chen, Z.Y., 2014. A single amino acid in the stalk region of the H1N1pdm  
985 influenza virus HA protein affects viral fusion, stability and infectivity. *PLoS pathogens* 10,  
986 e1003831.

- 987 Couceiro, J.N., Paulson, J.C., Baum, L.G., 1993. Influenza virus strains selectively recognize  
988 sialyloligosaccharides on human respiratory epithelium; the role of the host cell in selection of  
989 hemagglutinin receptor specificity. *Virus Res* 29, 155-165.
- 990 Daniels, R., Kurowski, B., Johnson, A.E., Hebert, D.N., 2003. N-linked glycans direct the  
991 cotranslational folding pathway of influenza hemagglutinin. *Mol Cell* 11, 79-90.
- 992 Davis, A.S., Chertow, D.S., Moyer, J.E., Suzich, J., Sandouk, A., Dorward, D.W., Logun, C.,  
993 Shelhamer, J.H., Taubenberger, J.K., 2015. Validation of normal human bronchial epithelial cells as  
994 a model for influenza A infections in human distal trachea. *J Histochem Cytochem* 63, 312-328.
- 995 de Graaf, M., Fouchier, R.A., 2014. Role of receptor binding specificity in influenza A virus  
996 transmission and pathogenesis. *The EMBO journal* 33, 823-841.
- 997 de Vries, E., Du, W., Guo, H., de Haan, C.A.M., 2020. Influenza A virus hemagglutinin-neuraminidase-  
998 receptor balance: Preserving virus motility. *Trends Microbiol* 28, 57-67.
- 999 de Vries, R.P., de, V.E., Moore, K.S., Rigter, A., Rottier, P.J., de Haan, C.A., 2011. Only two residues  
1000 are responsible for the dramatic difference in receptor binding between swine and new pandemic H1  
1001 hemagglutinin. *J Biol Chem* 286, 5868-5875.
- 1002 Du, W., Guo, H., Nijman, V.S., Doedt, J., van der Vries, E., van der Lee, J., Li, Z., Boons, G.J., van  
1003 Kuppeveld, F.J.M., de Vries, E., Matrosovich, M., de Haan, C.A.M., 2019. The 2nd sialic acid-  
1004 binding site of influenza A virus neuraminidase is an important determinant of the hemagglutinin-  
1005 neuraminidase-receptor balance. *Plos Pathog* 15, e1007860.
- 1006 Eisen, M.B., Sabesan, S., Skehel, J.J., Wiley, D.C., 1997. Binding of the influenza A virus to cell-  
1007 surface receptors: structures of five hemagglutinin-sialyloligosaccharide complexes determined by  
1008 X-ray crystallography. *Virology* 232, 19-31.
- 1009 Gallagher, P.J., Henneberry, J.M., Sambrook, J.F., Gething, M.J., 1992. Glycosylation requirements for  
1010 intracellular transport and function of the hemagglutinin of influenza virus. *J Virol* 66, 7136-7145.
- 1011 Galloway, S.E., Reed, M.L., Russell, C.J., Steinhauer, D.A., 2013. Influenza HA subtypes demonstrate  
1012 divergent phenotypes for cleavage activation and pH of fusion: implications for host range and  
1013 adaptation. *PLoS pathogens* 9, e1003151.
- 1014 Gambaryan, A.S., Marinina, V.P., Tuzikov, A.B., Bovin, N.V., Rudneva, I.A., Sinitsyn, B.V., Shilov,  
1015 A.A., Matrosovich, M.N., 1998a. Effects of host-dependent glycosylation of hemagglutinin on  
1016 receptor-binding properties on H1N1 human influenza A virus grown in MDCK cells and in  
1017 embryonated eggs. *Virology* 247, 170-177.
- 1018 Gambaryan, A.S., Matrosovich, M.N., Bender, C.A., Kilbourne, E.D., 1998b. Differences in the  
1019 biological phenotype of low-yielding (L) and high-yielding (H) variants of swine influenza virus  
1020 A/NJ/11/76 are associated with their different receptor-binding activity. *Virology* 247, 223-231.
- 1021 Gambaryan, A.S., Matrosovich, T.Y., Boravleva, E.Y., Lomakina, N.F., Yamnikova, S.S., Tuzikov,  
1022 A.B., Pazynina, G.V., Bovin, N.V., Fouchier, R.A.M., Klenk, H.D., Matrosovich, M.N., 2018.  
1023 Receptor-binding properties of influenza viruses isolated from gulls. *Virology* 522, 37-45.
- 1024 Gambaryan, A.S., Matrosovich, T.Y., Philipp, J., Munster, V.J., Fouchier, R.A., Cattoli, G., Capua, I.,  
1025 Krauss, S.L., Webster, R.G., Banks, J., Bovin, N.V., Klenk, H.D., Matrosovich, M.N., 2012.  
1026 Receptor-binding profiles of H7 subtype influenza viruses in different host species. *J Virol* 86, 4370-  
1027 4379.

- 1028 Gamblin, S.J., Vachieri, S.G., Xiong, X., Zhang, J., Martin, S.R., Skehel, J.J., 2020. Hemagglutinin  
1029 structure and activities. *Cold Spring Harb Perspect Med*, a038638.
- 1030 Gerlach, T., Hensen, L., Matrosovich, T., Bergmann, J., Winkler, M., Peteranderl, C., Klenk, H.D.,  
1031 Weber, F., Herold, S., Pohlmann, S., Matrosovich, M., 2017. pH optimum of hemagglutinin-  
1032 mediated membrane fusion determines sensitivity of influenza A viruses to the interferon-induced  
1033 antiviral state and IFITMs. *J Virol* 91, e00246-00217.
- 1034 Guan, Y., Vijaykrishna, D., Bahl, J., Zhu, H., Wang, J., Smith, G.J., 2010. The emergence of pandemic  
1035 influenza viruses. *Protein Cell* 1, 9-13.
- 1036 Guo, Y., Wang, M., Zheng, G.S., Li, W.K., Kawaoka, Y., Webster, R.G., 1995. Seroepidemiological  
1037 and molecular evidence for the presence of two H3N8 equine influenza viruses in China in 1993-94.  
1038 *J Gen Virol* 76, 2009-2014.
- 1039 Hall, T., 2004. BioEdit version 7.0. 0. Distributed by the author, website:  
1040 [www.mbio.ncsu.edu/BioEdit/bioedit.html](http://www.mbio.ncsu.edu/BioEdit/bioedit.html).
- 1041 Hebert, D.N., Zhang, J.X., Chen, W., Foellmer, B., Helenius, A., 1997. The number and location of  
1042 glycans on influenza hemagglutinin determine folding and association with calnexin and calreticulin.  
1043 *J Cell Biol* 139, 613-623.
- 1044 Hensley, S.E., Das, S.R., Bailey, A.L., Schmidt, L.M., Hickman, H.D., Jayaraman, A., Viswanathan, K.,  
1045 Raman, R., Sasisekharan, R., Bennink, J.R., Yewdell, J.W., 2009. Hemagglutinin receptor binding  
1046 avidity drives influenza A virus antigenic drift. *Science* 326, 734-736.
- 1047 Herfst, S., Schrauwen, E.J., Linster, M., Chutinimitkul, S., de Wit, E., Munster, V.J., Sorrell, E.M.,  
1048 Bestebroer, T.M., Burke, D.F., Smith, D.J., Rimmelzwaan, G.F., Osterhaus, A.D., Fouchier, R.A.,  
1049 2012. Airborne transmission of influenza A/H5N1 virus between ferrets. *Science* 336, 1534-1541.
- 1050 Hoffmann, E., Neumann, G., Kawaoka, Y., Hobom, G., Webster, R.G., 2000. A DNA transfection  
1051 system for generation of influenza A virus from eight plasmids. *Proc Natl Acad Sci U S A* 97, 6108-  
1052 6113.
- 1053 Hothorn, T., Bretz, F., Westfall, P., 2008. Simultaneous inference in general parametric models.  
1054 *Biometrical Journal: J Material Met Biosci* 50, 346-363.
- 1055 Imai, M., Watanabe, T., Hatta, M., Das, S.C., Ozawa, M., Shinya, K., Zhong, G., Hanson, A., Katsura,  
1056 H., Watanabe, S., Li, C., Kawakami, E., Yamada, S., Kiso, M., Suzuki, Y., Maher, E.A., Neumann,  
1057 G., Kawaoka, Y., 2012. Experimental adaptation of an influenza H5 HA confers respiratory droplet  
1058 transmission to a reassortant H5 HA/H1N1 virus in ferrets. *Nature* 486, 420-428.
- 1059 Inkster, M.D., Hinshaw, V.S., Schulze, I.T., 1993. The hemagglutinins of duck and human H1 influenza  
1060 viruses differ in sequence conservation and in glycosylation. *J Virol* 67, 7436-7443.
- 1061 Kalyaanamoorthy, S., Minh, B.Q., Wong, T.K.F., von Haeseler, A., Jermini, L.S., 2017. ModelFinder:  
1062 fast model selection for accurate phylogenetic estimates. *Nat Methods* 14, 587-589.
- 1063 Kaverin, N.V., Matrosovich, M.N., Gambaryan, A.S., Rudneva, I.A., Shilov, A.A., Varich, N.L.,  
1064 Makarova, N.V., Kropotkina, E.A., Sinitsin, B.V., 2000. Intergenic HA-NA interactions in influenza  
1065 A virus: postreassortment substitutions of charged amino acid in the hemagglutinin of different  
1066 subtypes. *Virus Res* 66, 123-129.

- 1067 Kida, H., Kawaoka, Y., Naeve, C.W., Webster, R.G., 1987. Antigenic and genetic conservation of H3  
1068 influenza virus in wild ducks. *Virology* 159, 109-119.
- 1069 Kobasa, D., Kodihalli, S., Luo, M., Castrucci, M.R., Donatelli, I., Suzuki, Y., Suzuki, T., Kawaoka, Y.,  
1070 1999. Amino acid residues contributing to the substrate specificity of the influenza A virus  
1071 neuraminidase. *J Virol* 73, 6743-6751.
- 1072 Kosakovsky Pond, S.L., Frost, S.D.W., 2005. Not so different after all: A comparison of methods for  
1073 detecting amino acid sites under selection. *Mol Biol Evol* 22, 1208-1222.
- 1074 Kosakovsky Pond, S.L., Poon, A.F.Y., Leigh Brown, A.J., Frost, S.D.W., 2008. A maximum likelihood  
1075 method for detecting directional evolution in protein sequences and its application to influenza A  
1076 virus. *Mol Biol Evol* 25, 1809-1824.
- 1077 Kosakovsky Pond, S.L., Poon, A.F.Y., Velazquez, R., Weaver, S., Hepler, N.L., Murrell, B., Shank,  
1078 S.D., Magalis, B.R., Bouvier, D., Nekrutenko, A., Wisotsky, S., Spielman, S.J., Frost, S.D.W., Muse,  
1079 S.V., 2020. HyPhy 2.5-A customizable platform for evolutionary hypothesis testing using  
1080 phylogenies. *Mol Biol Evol* 37, 295-299.
- 1081 Kosakovsky Pond, S.L., Wisotsky, S.R., Escalante, A., Magalis, B.R., Weaver, S., 2021. Contrast-  
1082 FEL—a test for differences in selective pressures at individual sites among clades and sets of  
1083 branches. *Mol Biol Evol* 38, 1184-1198.
- 1084 Kryazhimskiy, S., Plotkin, J.B., 2008. The population genetics of dN/dS. *PLoS Genet* 4, e1000304.
- 1085 Kumar, S., Stecher, G., Tamura, K., 2016. MEGA7: Molecular evolutionary genetics analysis version  
1086 7.0 for bigger datasets. *Mol Biol Evol* 33, 1870-1874.
- 1087 Lee, R.T.C., Chang, H.H., Russell, C.A., Lipsitch, M., Maurer-Stroh, S., 2019. Influenza A  
1088 hemagglutinin passage bias sites and host specificity mutations. *Cells* 8, 958.
- 1089 Lenth, R., Singmann, H., Love, J., Buerkner, P., Herve, M., 2019. Estimated marginal means, aka least-  
1090 squares means. R package version 1.3. 2. Retrieved from [https://cran.r-](https://cran.r-project.org/package=emmeans)  
1091 [project.org/package=emmeans](https://cran.r-project.org/package=emmeans).
- 1092 Matrosovich, M., Matrosovich, T., Garten, W., Klenk, H.D., 2006a. New low-viscosity overlay medium  
1093 for viral plaque assays. *Virology* 361, 384-390.
- 1094 Matrosovich, M., Matrosovich, T., Uhlenhorff, J., Garten, W., Klenk, H.D., 2007. Avian-virus-like  
1095 receptor specificity of the hemagglutinin impedes influenza virus replication in cultures of human  
1096 airway epithelium. *Virology* 361, 384-390.
- 1097 Matrosovich, M., Tuzikov, A., Bovin, N., Gambaryan, A., Klimov, A., Castrucci, M.R., Donatelli, I.,  
1098 Kawaoka, Y., 2000. Early alterations of the receptor-binding properties of H1, H2, and H3 avian  
1099 influenza virus hemagglutinins after their introduction into mammals. *J Virol* 74, 8502-8512.
- 1100 Matrosovich, M.N., Gambaryan, A.S., 2012. Solid-phase assays of receptor-binding specificity.  
1101 *Methods Mol Biol* 865, 71-94.
- 1102 Matrosovich, M.N., Klenk, H.-D., Kawaoka, Y., 2006b. Receptor specificity, host range and  
1103 pathogenicity of influenza viruses, in: Kawaoka, Y. (Ed.), *Influenza Virology: Current Topics*.  
1104 Caister Academic Press, Wymondham, England, pp. 95-137.

- 1105 Matrosovich, M.N., Matrosovich, T.Y., Gray, T., Roberts, N.A., Klenk, H.D., 2004. Human and avian  
1106 influenza viruses target different cell types in cultures of human airway epithelium. *Proc Natl Acad*  
1107 *Sci U S A* 101, 4620-4624.
- 1108 Medeiros, R., Naffakh, N., Manuguerra, J.C., van der Werf, S., 2004. Binding of the hemagglutinin  
1109 from human or equine influenza H3 viruses to the receptor is altered by substitutions at residue 193.  
1110 *Arch Virol* 149, 1663-1671.
- 1111 Minh, B.Q., Schmidt, H.A., Chernomor, O., Schrempf, D., Woodhams, M.D., von Haeseler, A.,  
1112 Lanfear, R., 2020. IQ-TREE 2: New models and efficient methods for phylogenetic inference in the  
1113 genomic era. *Mol Biol Evol* 37, 1530-1534.
- 1114 Munster, V.J., de Wit, E., van den Brand, J.M., Herfst, S., Schrauwen, E.J., Bestebroer, T.M., van de  
1115 Vijver, D., Boucher, C.A., Koopmans, M., Rimmelzwaan, G.F., Kuiken, T., Osterhaus, A.D.,  
1116 Fouchier, R.A., 2009. Pathogenesis and transmission of swine-origin 2009 A(H1N1) influenza virus  
1117 in ferrets. *Science* 325, 481-483.
- 1118 Murrell, B., Wertheim, J.O., Moola, S., Weighill, T., Scheffler, K., Kosakovsky Pond, S.L., 2012.  
1119 Detecting individual sites subject to episodic diversifying selection. *PLoS Genet* 8, e1002764.
- 1120 Ohuchi, M., Ohuchi, R., Sakai, T., Matsumoto, A., 2002. Tight binding of influenza virus  
1121 hemagglutinin to its receptor interferes with fusion pore dilation. *J Virol* 76, 12405-12413.
- 1122 Okonechnikov, K., Golosova, O., Fursov, M., team, U., 2012. Unipro UGENE: a unified bioinformatics  
1123 toolkit. *Bioinformatics (Oxford, England)* 28, 1166-1167.
- 1124 Olsen, B., Munster, V.J., Wallensten, A., Waldenström, J., Osterhaus, A.D., Fouchier, R.A., 2006.  
1125 Global patterns of influenza a virus in wild birds. *Science* 312, 384-388.
- 1126 Parrish, C.R., Murcia, P.R., Holmes, E.C., 2015. Influenza virus reservoirs and intermediate hosts: dogs,  
1127 horses, and new possibilities for influenza virus exposure of humans. *J Virol* 89, 2990-2994.
- 1128 Peng, W., Bouwman, K.M., McBride, R., Grant, O.C., Woods, R.J., Verheije, M.H., Paulson, J.C., de  
1129 Vries, R.P., 2018. Enhanced human-type receptor binding by ferret-transmissible H5N1 with a  
1130 K193T mutation. *J Virology* 92.
- 1131 Pond, S.L., Frost, S.D., Grossman, Z., Gravenor, M.B., Richman, D.D., Brown, A.J., 2006. Adaptation  
1132 to different human populations by HIV-1 revealed by codon-based analyses. *PLoS Comp Biol* 2, e62.
- 1133 Reed, M.L., Yen, H.L., DuBois, R.M., Bridges, O.A., Salomon, R., Webster, R.G., Russell, C.J., 2009.  
1134 Amino acid residues in the fusion peptide pocket regulate the pH of activation of the H5N1 influenza  
1135 virus hemagglutinin protein. *J Virol* 83, 3568-3580.
- 1136 Rigby, R.A., Stasinopoulos, D.M., 2005. Generalized additive models for location, scale and shape.  
1137 *Journal of the Royal Statistical Society: Series C (Applied Statistics)* 54, 507-554.
- 1138 Russell, C.J., Hu, M., Okda, F.A., 2018. Influenza hemagglutinin protein stability, activation, and  
1139 pandemic risk. *Trends Microbiol* 26, 841-853.
- 1140 Russier, M., Yang, G., Rehg, J.E., Wong, S.S., Mostafa, H.H., Fabrizio, T.P., Barman, S., Krauss, S.,  
1141 Webster, R.G., Webby, R.J., Russell, C.J., 2016. Molecular requirements for a pandemic influenza  
1142 virus: An acid-stable hemagglutinin protein. *Proc Natl Acad Sci U S A* 113, 1636-1641.
- 1143 Scholtissek, C., 1985. Stability of infectious influenza A viruses to treatment at low pH and heating.  
1144 *Arch Virol* 85, 1-11.

- 1145 Shi, Y., Wu, Y., Zhang, W., Qi, J., Gao, G.F., 2014. Enabling the 'host jump': structural determinants of  
1146 receptor-binding specificity in influenza A viruses. *Nature Rev Microbiol* 12, 822-831.
- 1147 Shu, Y., McCauley, J., 2017. GISAID: Global initiative on sharing all influenza data - from vision to  
1148 reality. *Euro Surveill* 22.
- 1149 Soh, Y.S., Moncla, L.H., Eguia, R., Bedford, T., Bloom, J.D., 2019. Comprehensive mapping of  
1150 adaptation of the avian influenza polymerase protein PB2 to humans. *eLife* 8, e45079.
- 1151 Taubenberger, J.K., Kash, J.C., 2010. Influenza virus evolution, host adaptation, and pandemic  
1152 formation. *Cell host & microbe* 7, 440-451.
- 1153 Thompson, A.J., Paulson, J.C., 2020. Adaptation of influenza viruses to human airway receptors. *J Biol*  
1154 *Chem*, 100017.
- 1155 Tuzikov, A., Chinarev, A., Shilova, N., Gordeeva, E., Galanina, O., Ovchinnikova, T., Schaefer, M.,  
1156 Bovin, N., 2021. 40 years of glyco-polyacrylamide in glycobiology. *Glycoconjugate J* 38, 89-100.
- 1157 Uhlenborff, J., Matrosovich, T., Klenk, H.D., Matrosovich, M., 2009. Functional significance of the  
1158 hemadsorption activity of influenza virus neuraminidase and its alteration in pandemic viruses. *Arch*  
1159 *Virol* 154, 945-957.
- 1160 Van Poucke, S., Doedt, J., Baumann, J., Qiu, Y., Matrosovich, T., Klenk, H.D., Van Reeth, K.,  
1161 Matrosovich, M., 2015. Role of substitutions in the hemagglutinin in the emergence of the 1968  
1162 pandemic influenza virus. *J Virol* 89, 12211-12216.
- 1163 Van Poucke, S., Uhlenborff, J., Wang, Z., Billiau, V., Nicholls, J., Matrosovich, M., Van Reeth, K.,  
1164 2013. Effect of receptor specificity of A/Hong Kong/1/68 (H3N2) influenza virus variants on  
1165 replication and transmission in pigs. *Influenza Other Respir Viruses* 7, 151-159.
- 1166 Wade, A., Jumbo, S.D., Zecchin, B., Fusaro, A., Taiga, T., Bianco, A., Rodrigue, P.N., Salomoni, A.,  
1167 Kameni, J.M.F., Zamperin, G., Nenkam, R., Foupouapouognigni, Y., Abdoukadi, S., Aboubakar,  
1168 Y., Wiersma, L., Cattoli, G., Monne, I., 2018. Highly pathogenic avian influenza A(H5N8) virus,  
1169 Cameroon, 2017. *Emerg Infect Dis* 24, 1367-1370.
- 1170 Wagner, R., Matrosovich, M., Klenk, H.D., 2002. Functional balance between haemagglutinin and  
1171 neuraminidase in influenza virus infections. *Rev Med Virol* 12, 159-166.
- 1172 Wang, D., Zhu, W., Yang, L., Shu, Y., 2020. The epidemiology, virology, and pathogenicity of human  
1173 infections with avian influenza viruses. *Cold Spring Harb Perspect Med*, a038620.
- 1174 Waterhouse, A.M., Procter, J.B., Martin, D.M.A., Clamp, M., Barton, G.J., 2009. Jalview Version 2—a  
1175 multiple sequence alignment editor and analysis workbench. *Bioinformatics (Oxford, England)* 25,  
1176 1189-1191.
- 1177 Webster, R.G., Bean, W.J., Gorman, O.T., Chambers, T.M., Kawaoka, Y., 1992. Evolution and ecology  
1178 of influenza A viruses. *Microbiological reviews* 56, 152-179.
- 1179 Wendel, I., Rubbenstroth, D., Doedt, J., Kochs, G., Wilhelm, J., Staeheli, P., Klenk, H.D., Matrosovich,  
1180 M., 2015. The avian-origin PB1 gene segment facilitated replication and transmissibility of the  
1181 H3N2/1968 pandemic influenza virus. *J Virol* 89, 4170-4179.
- 1182 WHO, 2002. WHO manual on animal influenza diagnosis and surveillance. World Health Organization.
- 1183 Wiley, D.C., Skehel, J.J., 1987. The structure and function of the hemagglutinin membrane glycoprotein  
1184 of influenza virus. *Annu Rev Biochem* 56, 365-394.

- 1185 Wu, N.C., Wilson, I.A., 2020. Structural biology of influenza hemagglutinin: An amaranthine  
1186 adventure. *Viruses* 12, 1053.
- 1187 Xiong, X., Tuzikov, A., Coombs, P.J., Martin, S.R., Walker, P.A., Gamblin, S.J., Bovin, N., Skehel,  
1188 J.J., 2013. Recognition of sulphated and fucosylated receptor sialosides by A/Vietnam/1194/2004  
1189 (H5N1) influenza virus. *Virus Res* 178, 12-14.
- 1190 Xu, R., Zhu, X., McBride, R., Nycholat, C.M., Yu, W., Paulson, J.C., Wilson, I.A., 2012. Functional  
1191 balance of the hemagglutinin and neuraminidase activities accompanies the emergence of the 2009  
1192 H1N1 influenza pandemic. *J Virol* 86, 9221-9232.
- 1193 Yasuda, J., Shortridge, K.F., Shimizu, Y., Kida, H., 1991. Molecular evidence for a role of domestic  
1194 ducks in the introduction of avian H3 influenza viruses to pigs in southern China, where the A/Hong  
1195 Kong/68 (H3N2) strain emerged. *J Gen Virol* 72, 2007-2010.
- 1196 Yoon, S.W., Webby, R.J., Webster, R.G., 2014. Evolution and ecology of influenza A viruses. *Curr Top*  
1197 *Microbiol Immunol* 385, 359-375.



**Table 1. Selection pressure analysis of 9 sites of the HA of avian, mammalian and human IAVs <sup>a</sup>.**

| Site | Substitutions (Syn : Non-Syn) <sup>b</sup> |     |      | Pervasive selection<br>dN/dS, FEL significance for dN≠dS <sup>c</sup> |       |          | Episodic positive selection number<br>of branches, MEME significance <sup>d</sup> |   |       | Directional selection<br>(target in H, empirical<br>Bayes factor) <sup>e</sup> | Comparative selection <sup>f</sup> |
|------|--------------------------------------------|-----|------|-----------------------------------------------------------------------|-------|----------|-----------------------------------------------------------------------------------|---|-------|--------------------------------------------------------------------------------|------------------------------------|
|      | A                                          | M   | H    | A                                                                     | M     | H        | A                                                                                 | M | H     |                                                                                |                                    |
| -2   | 13:14                                      | 0:1 | 2:5  | 0.491 *                                                               | 0.354 | 1.89     | 0                                                                                 | 0 | 0     |                                                                                |                                    |
| 62   | 18:1                                       | 1:2 | 2:5  | 0.0237 ***                                                            | 0.548 | 1.57     | 0                                                                                 | 0 | 0     |                                                                                | H>A ***, overall ***               |
| 63   | 4:5                                        | 1:2 | 1:2  | 0.145 ***                                                             | 0.767 | 0.782    | 0                                                                                 | 0 | 0     | N (37)                                                                         |                                    |
| 81   | 3:7                                        | 0:0 | 0:1  | 0.378 *                                                               | 0     | 0.675    | 5                                                                                 | 0 | 0     |                                                                                | overall *                          |
| 92   | 10:16                                      | 1:2 | 0:2  | 0.504 *                                                               | 0.616 | 0.734    | 0                                                                                 | 0 | 0     | T (41)                                                                         |                                    |
| 144  | 13:24                                      | 0:3 | 1:8  | 0.807                                                                 | 1.05  | 3.04 *   | 0                                                                                 | 0 | 0 *   |                                                                                | H>A *                              |
| 193  | 16:42                                      | 0:3 | 0:7  | 0.679                                                                 | 0.464 | 1.01     | 0                                                                                 | 3 | 0     |                                                                                |                                    |
| 226  | 14:0                                       | 0:0 | 3:15 | 0 ***                                                                 | 0 *   | 6.98 *** | 0                                                                                 | 0 | 7 *** |                                                                                | H>A ***, H>M ***, overall ***      |
| 228  | 17:0                                       | 1:1 | 2:0  | 0 ***                                                                 | 0.23  | 0 **     | 0                                                                                 | 0 | 0     |                                                                                |                                    |

<sup>a</sup> Groups A, M and H contained, respectively, 1492 sequences of avian IAVs, 406 sequences of equine, canine, feline and seal IAVs and 803 sequences of human IAVs isolated in the years from 1968 to the end of 1999 (set H). We restricted analyses only to internal branches (see Materials and Methods). Asterisks depict significance levels for the tests as follows: \*,  $P < 0.05$ ; \*\*,  $p < 0.01$ ; \*\*\*,  $p < 0.001$ .

<sup>b</sup> The number of synonymous and non-synonymous substitutions inferred to have occurred on internal branches in the corresponding group set with the SLAC method.

<sup>c</sup> Site-level dN/dS estimate along internal branches in the corresponding group inferred using the FEL method. Asterisks show significance levels for the test that  $dN \neq dS$ . When significant result is obtained, negative selection is inferred if  $dN/dS < 1$ , otherwise diversifying positive selection is inferred.

<sup>d</sup> Site-level characterization of episodic positive selection in the corresponding group inferred using the MEME method. Asterisks show significance levels for the test that  $dN > dS$  for some fraction of branches. The number of individual branches where episodic selection may have acted is indicated as well (empirical Bayes factor  $\geq 100$ )

<sup>e</sup> Site-level characterization of directional selection using the DEPS/FADE method. The residue that is the putative target of directional selection is indicated, with empirical Bayes factor supporting directional selection shown.

<sup>f</sup> Site-level characterization of differences in selective pressures between branch groups using the Contrast-FEL method. Asterisks show significance levels for the test that dN/dS differ between pairs of branch groups, or among all branch groups (overall). Notation like H>A means that dN/dS for “human” branches is greater than dN/dS for “avian” branches. Only significant results are listed.

**Table 2. Alteration of amino acids at 9 positions of the H3 HA during host shifts <sup>a</sup>.**

| Host-specific virus lineage and the earliest isolate                  | Position |     |      |      |     |     |       |     |     |
|-----------------------------------------------------------------------|----------|-----|------|------|-----|-----|-------|-----|-----|
|                                                                       | -2       | 62  | 63   | 81   | 92  | 144 | 193   | 226 | 228 |
| <b>Human/swine</b><br>Hong Kong/1/1968<br>Memphis/1/1968              | F→L      | R→I | D→N* | D→N* | N→K | A→G | N→S   | Q→L | G→S |
| <b>Equine</b><br>Equine/Miami/1/1963 (H3N8)                           | F/L/Y→H  |     | D→N* | D→Y  |     |     | N→K   |     |     |
| <b>Canine H3N2</b><br>Canine/Guangdong/1/2006                         |          |     |      | D→N* |     |     |       |     |     |
| <b>Eq/Jilin/1989</b><br>Equine/Jilin/1/1989 (H3N8)                    |          | R→G | D→N* | D→Y  |     |     | N/D→E |     |     |
| <b>Sporadic isolates of avian-like IAVs from mammals <sup>b</sup></b> |          |     |      |      | N→S |     | N→S   |     |     |

<sup>a</sup> Table shows substitutions at the indicated positions that separate the earliest isolates of stable mammalian lineages from the phylogenetically closest avian viruses. Empty cells indicate a lack of changes. Asterisk next to N indicates that substitution generates glycosylation site. The analysis was performed using 2489 HA sequences depicted in the Fig.11 and in supplementary Fig. S5.

<sup>b</sup> The HAs of 10 swine, canine and seal IAVs which clustered with HAs of avian viruses but did not form stable lineages. Substitutions were observed in two viruses, A/harbour seal/New Hampshire/179629/2011 (H3N8) (N92S) and A/seal/Massachusetts/3911/1992 (H3N3) (N193S)

**Table 3. Characteristics of avian-to-human amino acid substitutions in pandemic H3N2/1968 viruses**

|                                                    | <b>F(-2)L</b> | <b>R62I</b> | <b>D63N</b> | <b>D81N</b> | <b>N92K</b> | <b>A144G</b> | <b>N193S</b> | <b>226+228</b> |
|----------------------------------------------------|---------------|-------------|-------------|-------------|-------------|--------------|--------------|----------------|
| <b>Phenotypical effects <sup>a</sup></b>           |               |             |             |             |             |              |              |                |
| Preference for Neu5Ac2-6Gal-terminated receptors   |               |             |             |             |             |              |              | +              |
| Binding avidity                                    |               | +           | +           | +           | +           | +            | +            | +              |
| pH of conformational transition                    |               |             |             |             |             |              |              | +              |
| Fusion activity (polykarion/NH <sub>4</sub> Cl)    | +             |             | +           | +           |             |              |              | +              |
| Replication in MDCK                                |               | +           |             | +           | +           | +            | +            | + <sup>b</sup> |
| Replication in HTBE                                |               | +           | +           | +           |             | +            |              | + <sup>b</sup> |
| <b>Structural features</b>                         |               |             |             |             |             |              |              |                |
| Location in the functional region of the HA        | +             |             |             |             |             | +            | +            | +              |
| Alteration of charge/non-conservative substitution |               | +           | +           | +           | +           | +            |              | +              |
| Addition of N-glycan                               |               |             | +           | +           |             |              |              |                |
| <b>Variation of the codon in H3 HAs</b>            |               |             |             |             |             |              |              |                |
| Purifying selection in avian IAVs                  | +             | +           | +           | +           | +           |              |              | +              |
| Conserved amino acid in avian IAVs                 |               | +           | +           | +           |             |              |              | +              |
| Human-type amino acid is not found in avian IAVs   |               | +           | +           | +           | +           | +            |              | +              |
| Parallel evolution in mammalian IAVs               |               | +           | +           | +           |             |              | +            | + <sup>b</sup> |
|                                                    |               |             |             |             |             |              |              |                |
| <b>Total <sup>c</sup></b>                          | <b>3</b>      | <b>8</b>    | <b>9</b>    | <b>10</b>   | <b>5</b>    | <b>6</b>     | <b>4</b>     | <b>12</b>      |

<sup>a</sup> Plus indicates that point substitution in corresponding position affects properties of either HK, R5 or both viruses in one or more phenotypical assays used.

<sup>b</sup> These characteristics were described in the literature (Bateman et al., 2008; Connor et al., 1994; Matrosovich et al., 2007)

<sup>c</sup> Total number of plusses in the column. This number reflects probability of the adaptive role of the substitution during the avian-to-human transmission of the HA.

1200 **Figures**

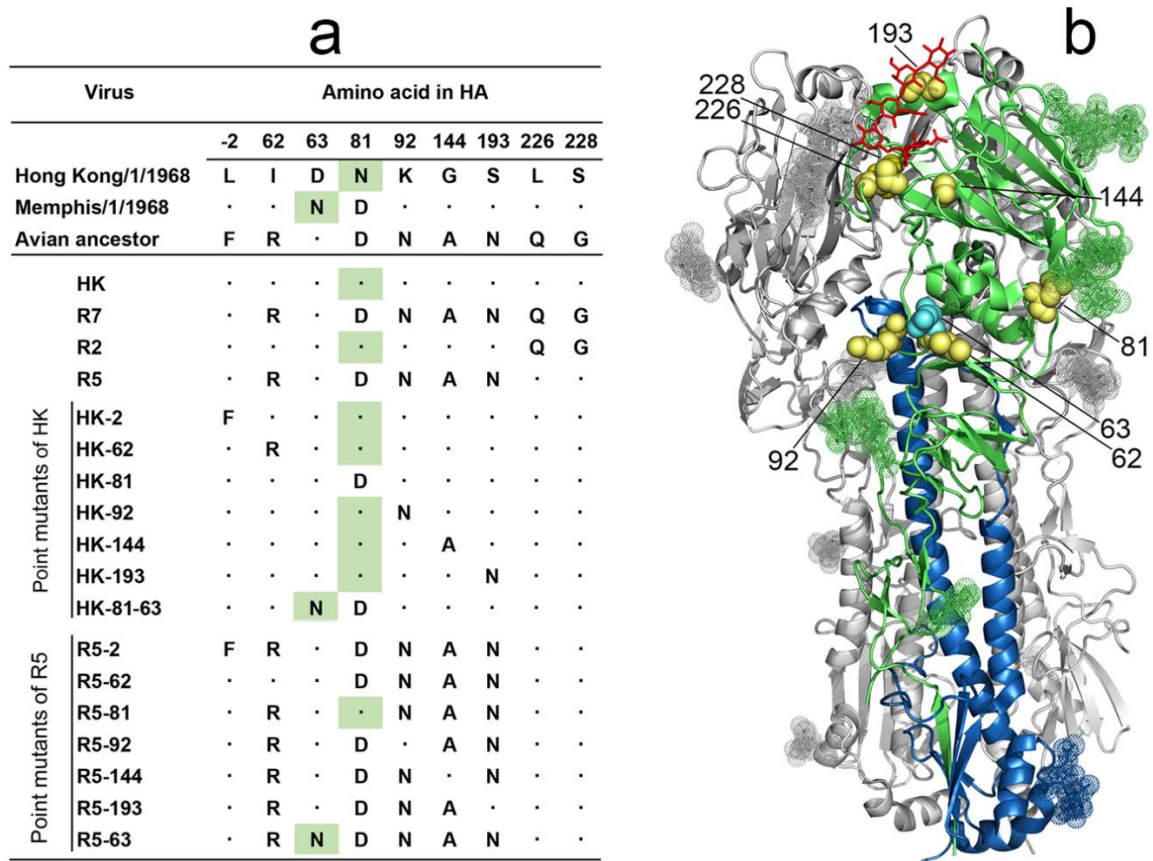

1201

1202

1203 **Fig. 1. HA sequences and designations of 2:6 recombinant IAVs used in this study.** (a) Amino  
 1204 acid differences between HAs of two 1968 pandemic virus lineages, their putative avian ancestor  
 1205 and 2:6 recombinant PR8-based viruses. Dots depict sequence identity with the HA of A/Hong  
 1206 Kong/1/1968. Numbering of amino acid positions starts from the N-terminus of the mature protein.  
 1207 Green background marks asparagine residues of glycosylation sites 63-65 and 81-83. (b) Location  
 1208 of amino acid substitutions shown as yellow space-filling models on the X-ray structure of the H3  
 1209 HA complex with human receptor analogue LSTc (2YPG.pdb) (Lin, Xiong et al. 2012). Two HA  
 1210 monomers are colored gray, and the third monomer is colored green (HA1) and blue (HA2). LSTc  
 1211 is shown as red stick model, N-linked glycans are shown as dotted space-filling models. Cyan  
 1212 spheres show location of N<sub>63</sub> present in the HA of A/Memphis/1/1968 lineage. The model was  
 1213 generated using PyMOL 2.0.6 (Schrödinger, LLC).

1214

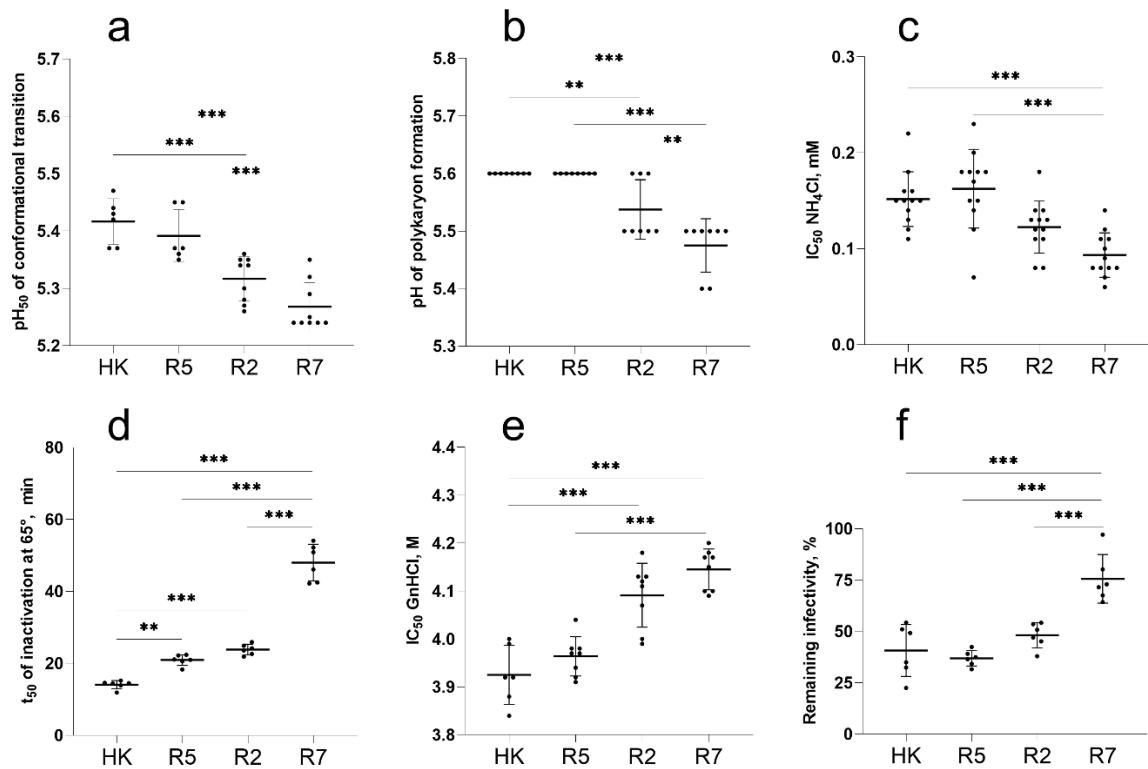

1215

1216 **Fig.2. Conformational stability and membrane fusion properties of HK, R5, R2 and R7.** (a)  
1217 pH of acid-induced conformational transition of HA. Solid-phase adsorbed viruses were incubated  
1218 in acidic buffers and treated with proteinase K. Viral binding of fet-HRP was assayed, and pH  
1219 values that corresponded to 50% reduction of HA binding activity (pH<sub>50</sub>) were determined from  
1220 binding-versus-pH curves. (b) pH threshold of polykaryon formation. Inoculated MDCK cells were  
1221 cultured for 16 h, treated with trypsin and exposed to different pH buffers. After returning to  
1222 neutral medium and incubation for 3 h, the cells were fixed, stained and analysed under the  
1223 microscope. The data show highest pH values at which polykaryon formation was detected. (c)  
1224 Inhibition of viral infection by ammonium chloride. MDCK cells were inoculated in the presence  
1225 of various concentrations of NH<sub>4</sub>Cl, incubated overnight, fixed, and immunostained for NP.  
1226 Concentrations of NH<sub>4</sub>Cl that reduced numbers of infected cells by 50% (IC<sub>50</sub>) were determined  
1227 from dose-response curves. (d) HA stability at elevated temperature. Solid-phase adsorbed viruses  
1228 were incubated in PBS at 65°C for different time periods and assayed for their binding to fet-HRP  
1229 to determine incubation time required for 50% reduction of the binding activity (t<sub>50</sub>). (e) HA  
1230 stability in chaotropic buffer. Solid-phase adsorbed viruses were incubated in buffers containing  
1231 GnHCl for 60 min at 4°C washed with PBS and assayed for binding to fet-HRP. Data show  
1232 concentrations of GnHCl that reduced viral binding activity by 50%. (f) Reduction of infectivity  
1233 after incubation of the viruses for 2 h at 45°C determined by focus assay in MDCK cells. All  
1234 panels show data points, mean values and SDs from 1 to 4 independent experiments performed  
1235 with 2 to 7 replicates. P values for the differences between the viruses were determined with  
1236 Tukey's multiple comparison procedure.

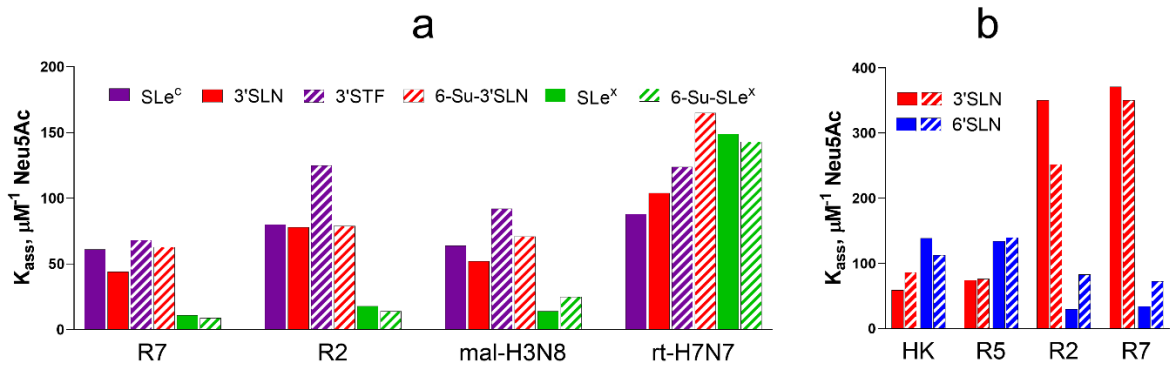

1237

1238 **Fig. 3. Binding of IAVs to biotinylated SGPs.** The solid-phase adsorbed viruses were allowed to

1239 bind biotinylated SGPs from solution, and association constants of virus complexes with SGPs

1240 ( $K_{ass}$ ) were determined as described in Materials and Methods. Higher values of  $K_{ass}$  reflect

1241 stronger binding. **(a)** Binding to six low molecular mass Neu5Ac $\alpha$ 2-3Gal-containing SGPs

1242 differing by structure of penultimate sugar moieties. Wild type IAVs A/mallard/Alberta/279/1998

1243 (H3N8) and A/ruddy turnstone/ Delaware/2378/1988 (H7N7) were tested in parallel with R7 and

1244 R2. Two to 4 experiments were performed on different days with similar results. Figure shows

1245 data from a representative experiment with one replicate for each virus-SGP. **(b)** Binding to high

1246 molecular mass SGPs 3'SLN and 6'SLN. Filled and hatched bars show mean values of

1247 experiments performed on two different days with two replicates per each virus-SGP.

1248

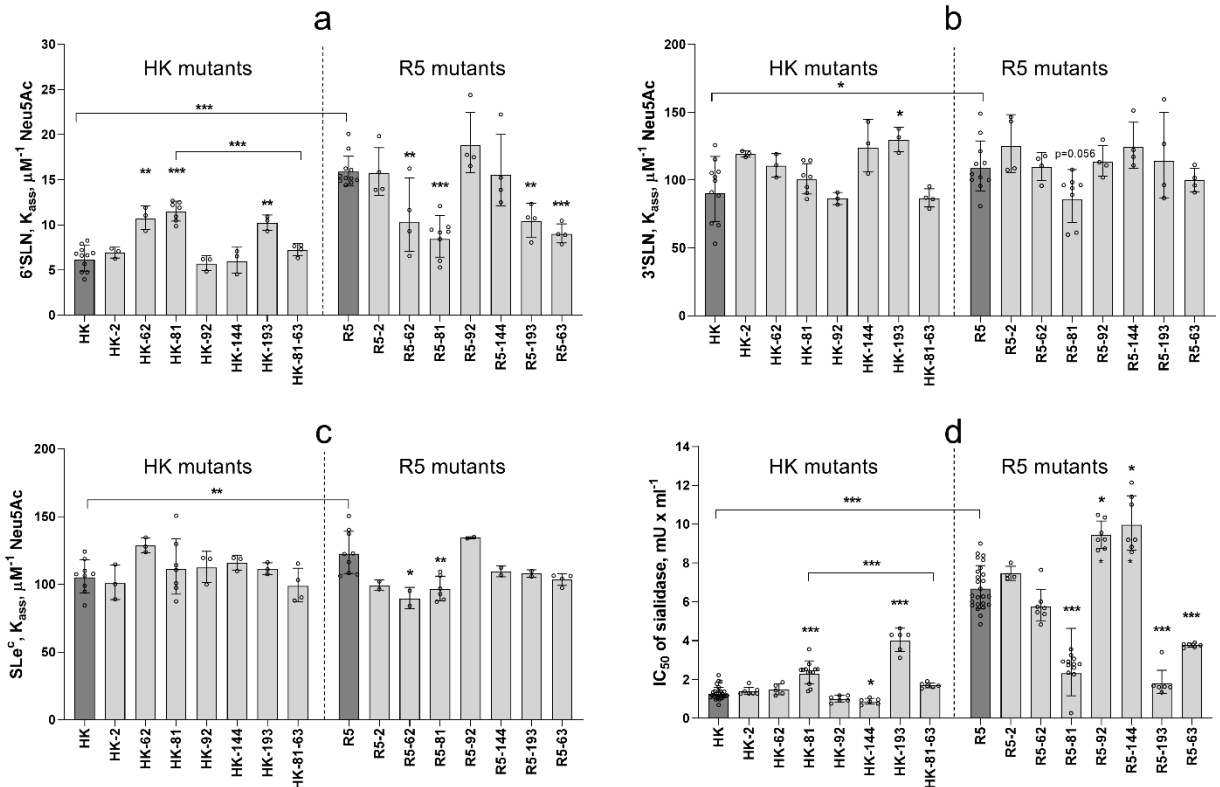

1249

1250

**Fig. 4. Receptor-binding properties of HA point mutants of HK and R5. (a-c)** Association

1251

constants of viral complexes with biotinylated SGPs 6'SLN (20 kDa), 3'SLN and SLe<sup>c</sup> (both 1

1252

MDa) were determined as described in Materials and Methods. Data represent combined results

1253

from 4 to 11 experiments performed on different days with 1 replicate for each virus-SGP pair per

1254

experiment. (d) Inhibition of viral cell entry by *Vibrio cholerae* sialidase. MDCK cells were

1255

incubated with solutions of gradually diluted sialidase for 30 min, inoculated with 200 FFU of the

1256

viruses without removing sialidase, fixed after one cycle of replication and immunostained for viral

1257

NP. The figure shows concentrations of sialidase that reduced numbers of infected cells by 50%

1258

(IC<sub>50</sub>). From 2 to 9 experiments were performed on different days using 3 to 4 replicates per virus.

1259

All panels show the individual values adjusted for day as described in section 2.16 of Materials and

1260

Methods with geometric mean (bars) and SDs. Vertical dotted line separates point mutants of HK

1261

and point mutants of R5. Asterisks depict P values for the differences between single-point mutants

1262

and the corresponding parental virus, either HK or R5 (dark gray bars). Asterisks over horizontal

1263

lines depict differences between HK and R5 and between HK-81 and HK-81-63.

1264

1265

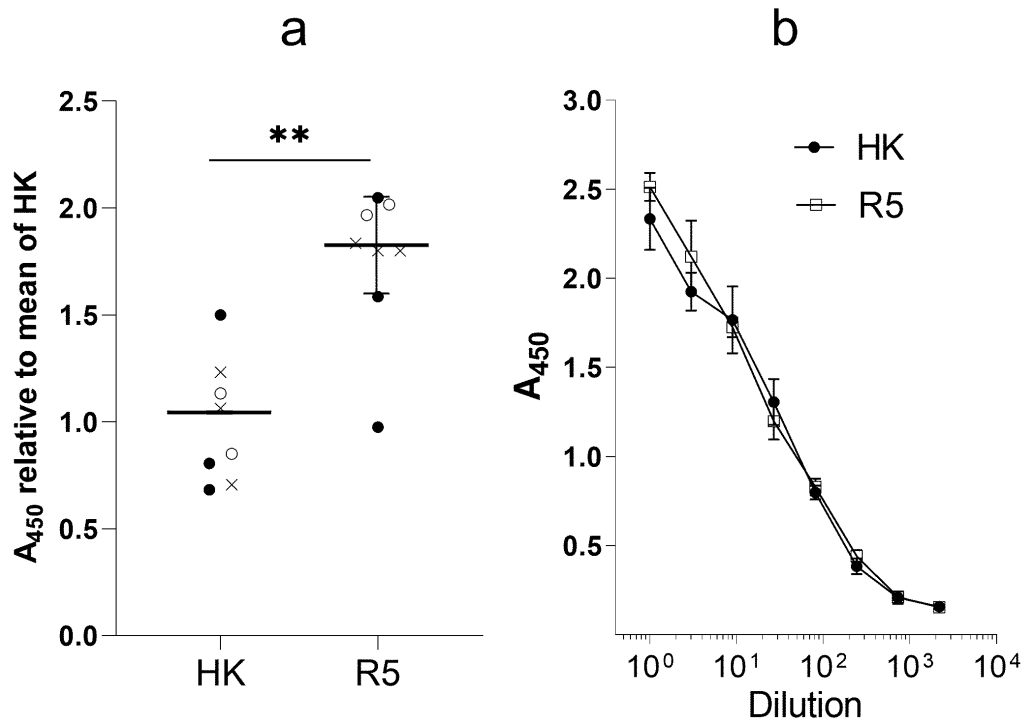

1266

1267

1268

1269

1270

1271

1272

1273

1274

1275

1276

1277

1278

1279

1280

1281

1282

1283

1284

1285

1286

**Fig. 5. Attachment of HK and R5 to cells in HTBE cultures.** (a) The apical sides of live HTBE cultures were washed with PBS+ to remove accumulated mucins and inoculated with 0.2 ml of DMEM-BSA containing  $1.3 \times 10^6$  FFU of HK and R5. Control cultures were inoculated with DMEM-BSA. After 1-h incubation at  $4^\circ\text{C}$  the cultures were washed, fixed and immune-stained using anti-HK primary antibodies and HRP-labelled secondary antibodies. The mean absorbance in the control cultures was subtracted, and the results were expressed as the relative absorbance at 450 nm ( $A_{450}$ ) in R5-treated and HK-treated cultures with respect to the mean absorbance in the latter. Open circles, closed circles and crosses depict individual data points from three experiments performed on different days. Mean, SD and P values were calculated using within-day averages. (b) Control of the concentrations of physical virus particles in suspensions of HK and R5 used for the HTBE attachment experiments. Suspensions were serially diluted in PBS and adsorbed in the wells of ELISA microplates. The wells were washed, fixed and immuno-stained as described above. Shown are the results of one experiment with 5 replicates per condition. The absorbance ( $A_{450}$ ) reflects non-specific binding of HK and R5 to the plastic. Overlap of the  $A_{450}$  vs dilution curves indicate that suspensions contained equal amounts of viral particles.



1287  
1288  
1289

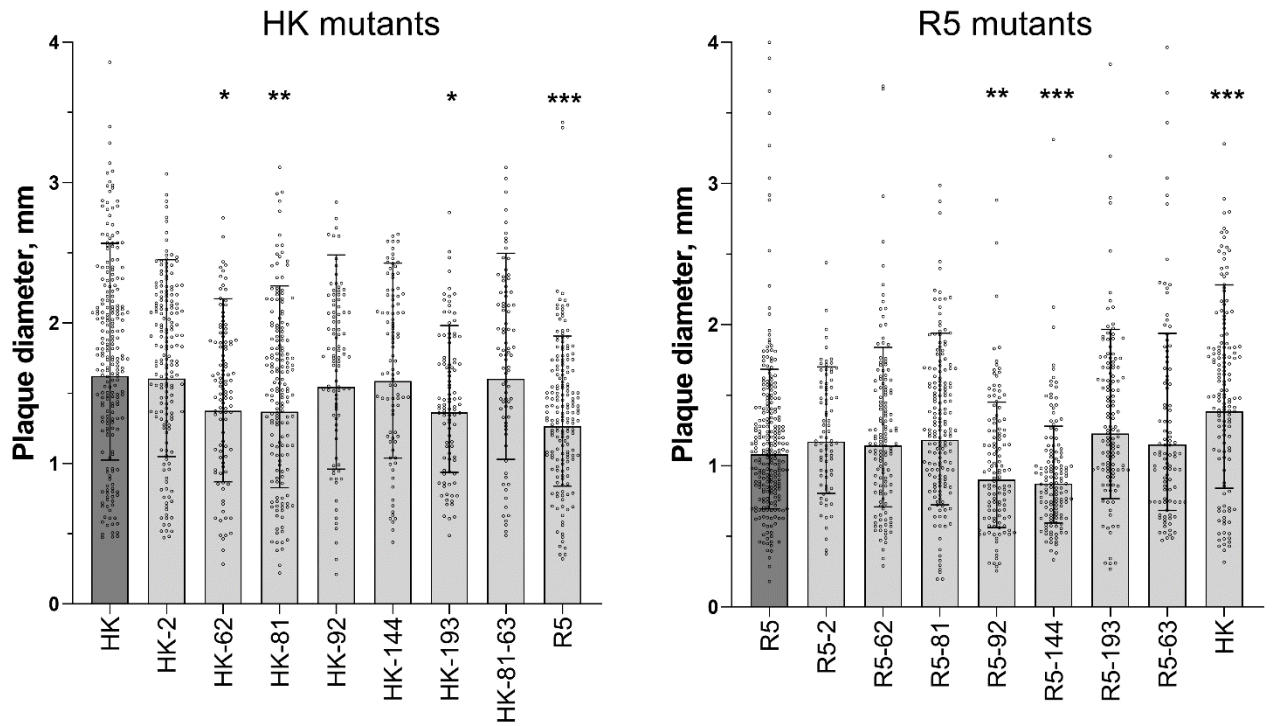

1290

1291 **Fig. 6. Diameter of plaques formed by viruses in MDCK cells.** Cells in six-well plates were  
1292 inoculated, incubated under semi-solid overlay medium for 48 h at 37°C, fixed and immunostained.  
1293 Two panels represent two groups of viruses tested separately. Each panel shows diameters of  
1294 individual plaques adjusted for day as described in Materials and Methods, geometric mean (bars)  
1295 and geometric SDs from 1 to 4 experiments performed on different days. Asterisks depict P values  
1296 for the differences between the mutants and the corresponding parental virus (HK in the left panel  
1297 and R5 in the right panel).

1298

1299

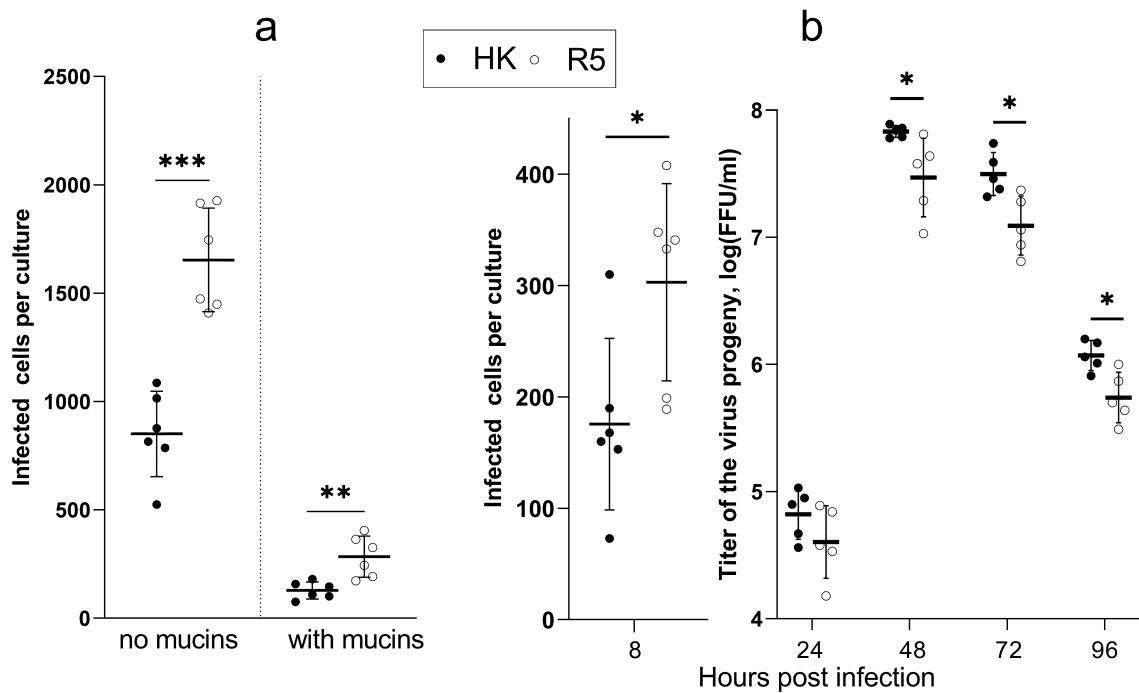

1300

1301 **Fig. 7. Infectivity and multicycle replication of HK and R5 in HTBE cultures.** (a) The apical  
1302 sides of HTBE cultures were washed with PBS+ to remove mucins and inoculated with  $2 \times 10^4$  FFU  
1303 of HK (closed circles) and R5 (open circles) with and without addition of mucins using 6 replicate  
1304 cultures per condition. The inoculum was removed after 1 h. The cultures were incubated for 7 h  
1305 under ALI conditions, fixed, immuno-stained for viral NP, and numbers of infected cells were  
1306 counted. (b) The apical sides of washed HTBE cultures were inoculated with  $7 \times 10^4$  FFU of the  
1307 viruses without addition of mucins and processed as described above. Six cultures per virus were  
1308 fixed 8 h post infection for immuno-staining and counting of infected cells. Viral progeny was  
1309 periodically harvested by washing the apical sides of the remaining cultures, and the harvests were  
1310 titrated simultaneously at the end of the experiment. P values were determined using Student's t-  
1311 test.

1312

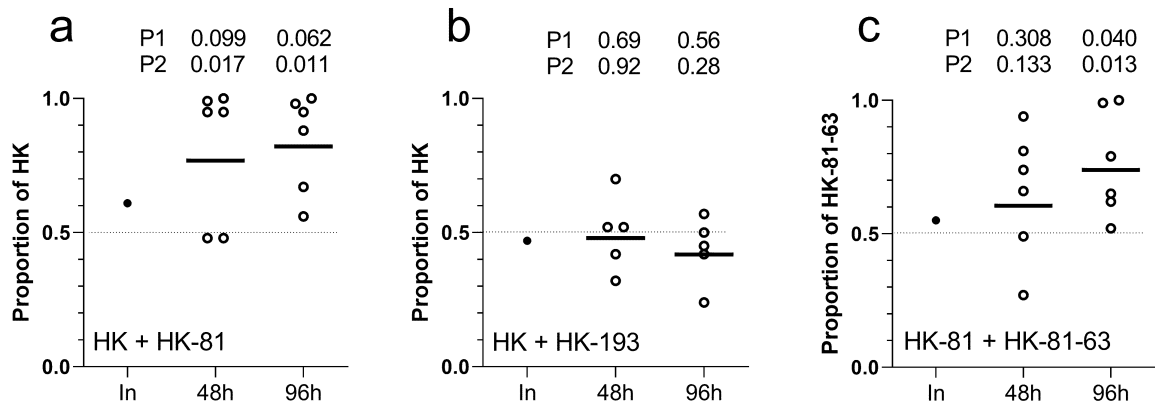

1313

1314 **Fig.8. Comparison of viral fitness in HTBE cultures in competitive replication experiments.**

1315 Replicate cultures were inoculated with one-to-one mixtures of HK and HK-81 (a), HK and HK-  
1316 193 (b), and HK-81 and HK-81-63 (c) using  $4 \times 10^3$  FFU of each virus per culture. Proportions of  
1317 viral genotypes in the original inoculum (In) and in the material harvested 48 h and 96 h post  
1318 inoculation were determined by Sanger sequencing. Figures show proportion of the HA genotype  
1319 of the indicated virus in the inoculum (solid circle) and in the replicate infected cultures (empty  
1320 circles); solid lines depict mean values. P values refer to the differences with respect to the  
1321 genotype proportion in the inoculum (P1) and with respect to the targeted 1:1 proportion in the  
1322 inoculum of infectious virus particles (dotted line) (P2).

1323

1324

1325

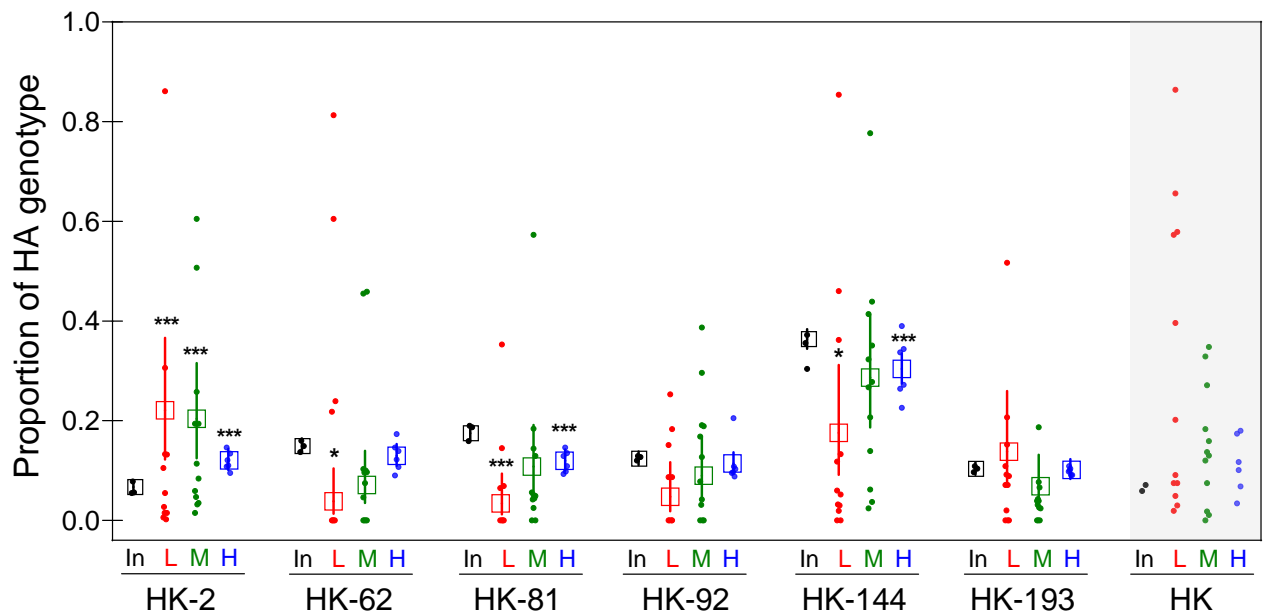

1326

1327 **Fig 9. Competitive replication of HK and its 6 single-point HA mutants in HTBE cultures.**

1328 HTBE cultures were inoculated with the mixtures of HK and its 6 HA mutants containing 5 PFU

1329 (L, 12 replicate cultures), 20 PFU (M, 12 replicates) and 320 PFU (H, 6 replicates) of each virus.

1330 After 1-h incubation, the inoculum was removed, the cultures were incubated under ALI

1331 conditions, and the apical material was harvested at 72 h post-inoculation. Small circles show

1332 proportions of each HA genotype determined by next generation sequencing in the inoculated

1333 mixture (In) and in each replicate harvest in the L, M and H groups. Empty squares and error bars

1334 represent the predicted mean values and confidence intervals inferred by a generalized linear

1335 model, considering the over-dispersion of the data. Asterisks depict differences between proportion

1336 of the corresponding genotype in the harvest and the inoculum. The proportions of the parent HK

1337 virus (gray background) were inferred by subtracting proportions of six HA variants from 1. These

1338 data are shown for illustration only; no hypotheses were tested.

1339

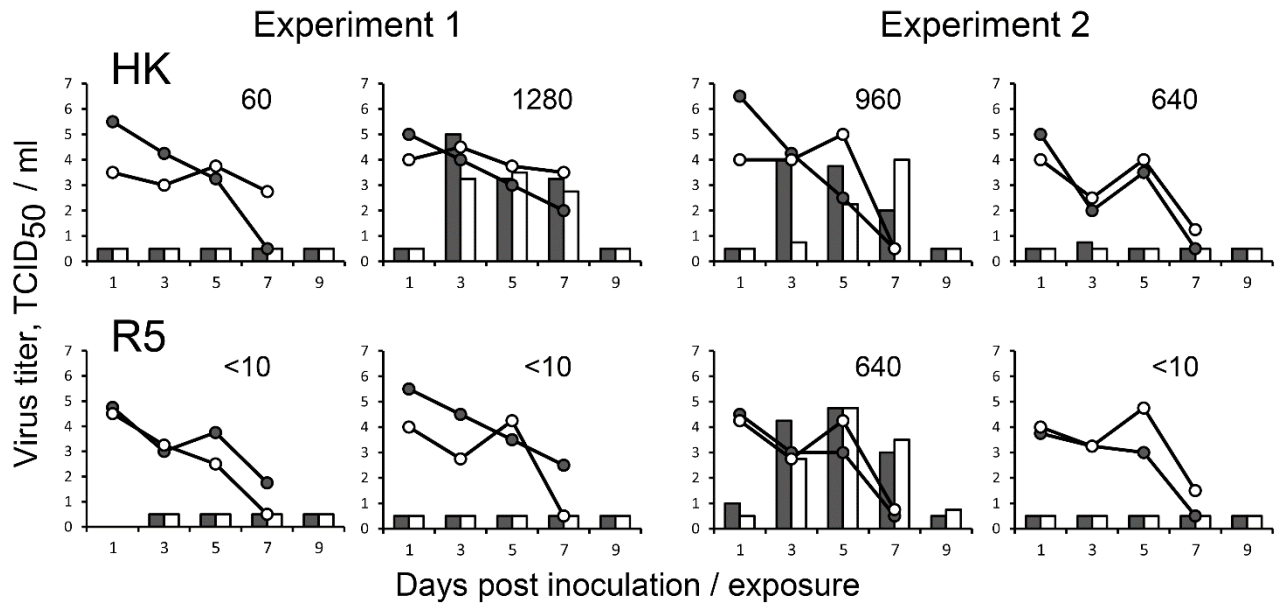

1340

1341 **Fig. 10. Comparison of airborne transmission of HK and R5 in ferrets.** Groups of two ferrets  
1342 were inoculated intranasally with  $10^6$  TCID<sub>50</sub> of recombinant viruses HK (top panels) and R5  
1343 (bottom panels) containing all eight gene segments of A/Hong Kong/1/1968. One naïve ferret was  
1344 co-housed with each inoculated ferret in a separate transmission cage starting from one day after  
1345 inoculation. Data show results of two replicate experiments performed on different days. Lines  
1346 depict viral titers in nasal swabs (empty circles) and throat swabs (closed circles) collected from  
1347 inoculated ferrets. White and black bars depict viral titers in nasal and throat swabs, respectively,  
1348 of the indirect contact ferrets. Numbers show titers of hemagglutination inhibiting antibodies in the  
1349 blood collected from the indirect contact animals, 2 weeks post exposure.

1350

1351

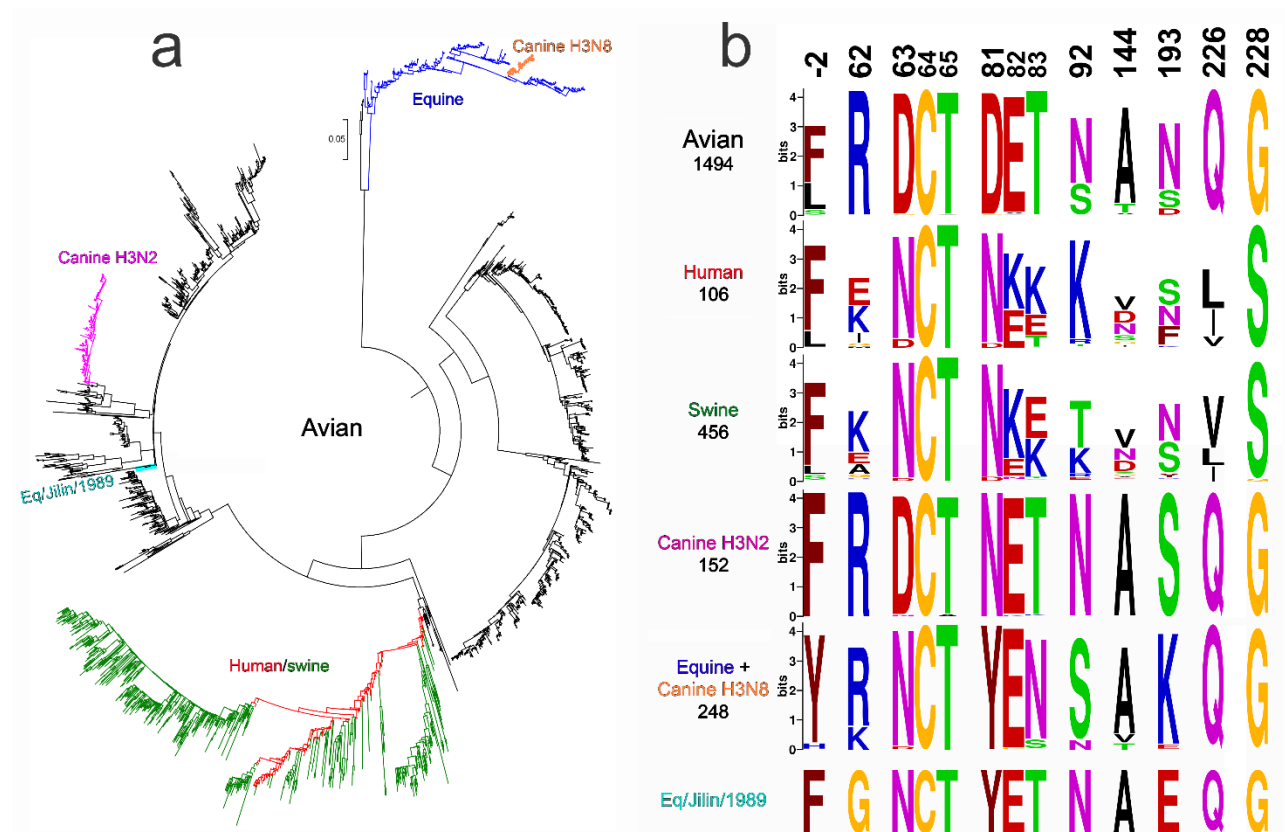

1352

1353 **Fig.11. Host-specific lineages of IAVs with H3 HA and variation of amino acids at selected**  
 1354 **HA positions. (a)** Phylogenetic tree for the H3 HA nucleotide sequences of representative  
 1355 sequences of human and swine viruses and all unique sequences of other mammalian and avian  
 1356 viruses available from GISAID EpiFlu database. The numbers of analysed sequences are shown in  
 1357 panel b below the lineage name. Supplementary figure S5 shows the same tree with strain names,  
 1358 accession numbers and amino acids at 9 HA positions under study. **(b)** Protein logos for indicated  
 1359 HA positions of the viral lineages shown in panel a. The overall height of each stack of letters  
 1360 depicts sequence conservation measured in bits. The height of each letter is proportional to the  
 1361 frequency of the corresponding amino acid in the alignment, the letters are ordered from most to  
 1362 least frequent. Only one sequence was available for the Eq/Jilin/1989 lineage.

1363
